# Supplementary material
Source: PubMed Central journal article supplement (PMC6718162)
Supplement: NIHMS1038273-supplement-supplement.pdf [file NIHMS1038273-supplement-supplement.pdf]

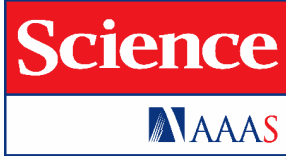

## Supplementary Materials for

### **Pan-tumor genomic biomarkers for PD-1 checkpoint blockade–based immunotherapy**

Razvan Cristescu\*, Robin Mogg, Mark Ayers, Andrew Albright, Erin Murphy,  
Jennifer Yearley, Xinwei Sher, Xiao Qiao Liu, Hongchao Lu, Michael Nebozhyn,  
Chunsheng Zhang, Jared K. Lunceford, Andrew Joe, Jonathan Cheng, Andrea L. Webber,  
Nageatte Ibrahim, Elizabeth R. Plimack, Patrick A. Ott, Tanguy Y. Seiwert,  
Antoni Ribas, Terrill K. McClanahan, Joanne E. Tomassini, Andrey Loboda,  
David Kaufman

\*Corresponding author. Email: [razvan\\_cristescu@merck.com](mailto:razvan_cristescu@merck.com)

Published 12 October 2018, *Science* **362**, eaar3593 (2018)  
DOI: 10.1126/science.aar3593

#### **This PDF file includes:**

Figs. S1 to S6  
Tables S1 to S7  
References

**Correction:** Since the original publication, table S2 has been expanded to include the raw NanoString counts for the housekeeping and predictor genes that make up the GEP score, as well as the weighting algorithm used to determine the score (table S2B).

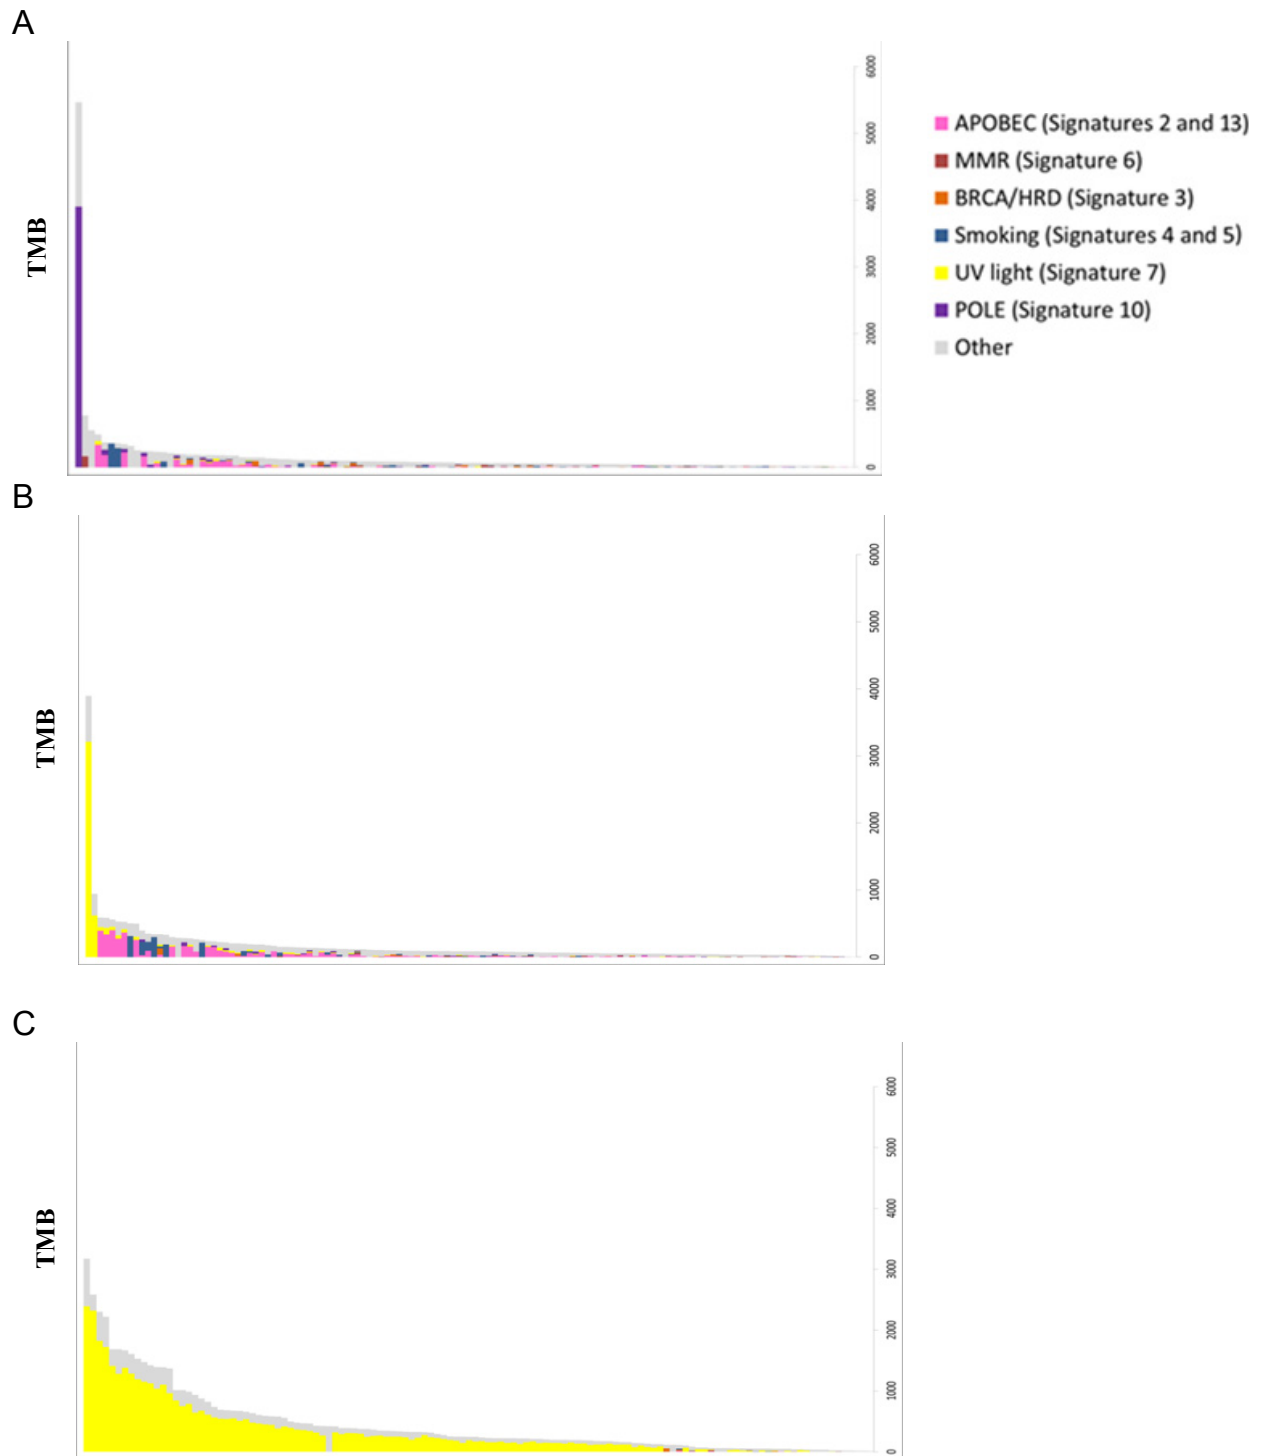

**Fig. S1**

**Distribution and spectrum of TMB across indications.** The major signatures(17) displayed above were identified in the mutational landscape of the patients in the clinical cohorts in this study and are illustrated as proportions of the TMB. (A) Pan-cancer cohort, (B) Head and neck, (C) Melanoma.

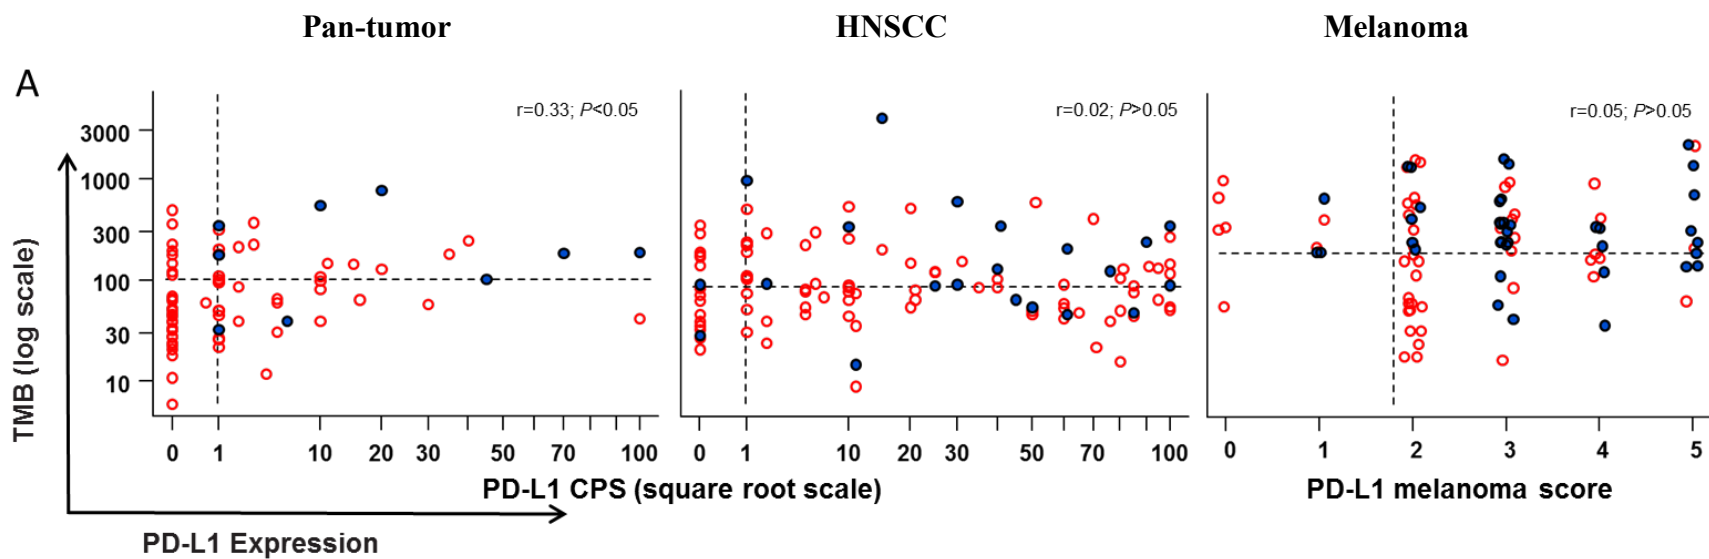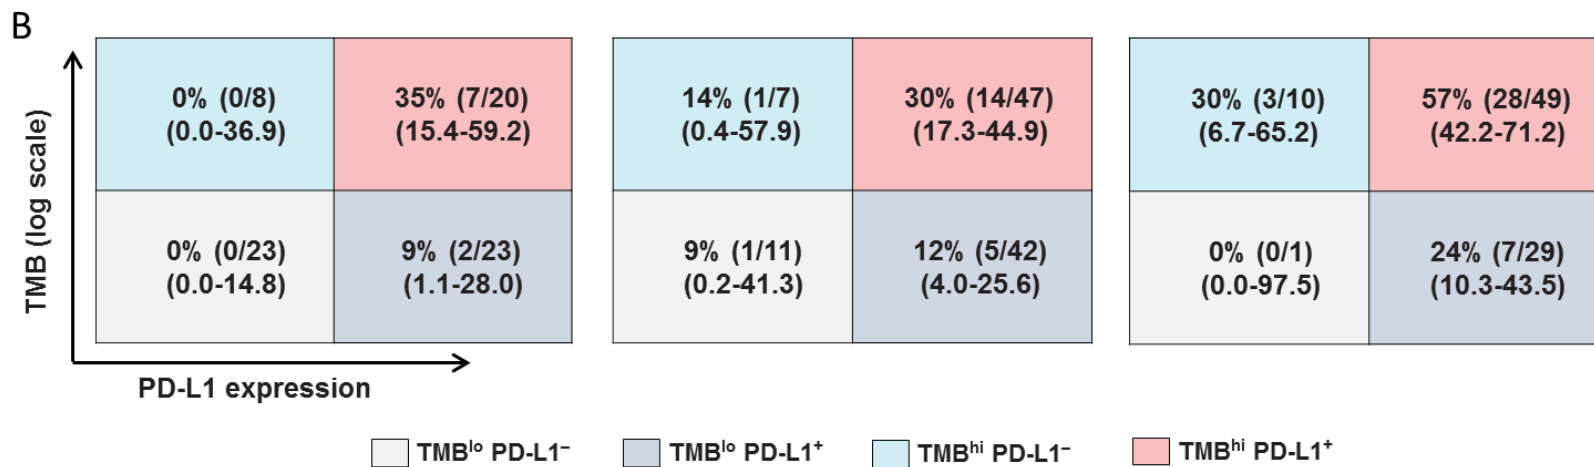

**Fig. S2**

**Relationships between PD-L1 and TMB with BOR in pan-tumor validation, HNSCC and melanoma cohorts.** (A) Relationships between TMB and PD-L1 with BOR; responder is PR or CR (filled circles); non-responder is not PR or CR (open circles). Dashed horizontal lines represent the Youden-Index associated cutoffs for TMB in each cohort as derived from AUROCs in Figure 1C. Dashed vertical lines represent PD-L1 CPS cutoff of 1. (B) Response (PR or CR) rates (%; n/N for responder/cut-off defined group, 95% CI) per TMB and PD-L1 cut-off status as designated in (A). TMB<sup>hi</sup> and PD-L1<sup>-</sup> response groups are defined by  $\geq$  and  $<$  Youden-Index associated cutpoints (102.5, 86, 191.5 for pan-cancer, HNSCC, melanoma cohorts, respectively); PD-L1<sup>+</sup> and PD-L1<sup>-</sup> groups are defined cut-offs  $\geq 1$  and 0 respectively.

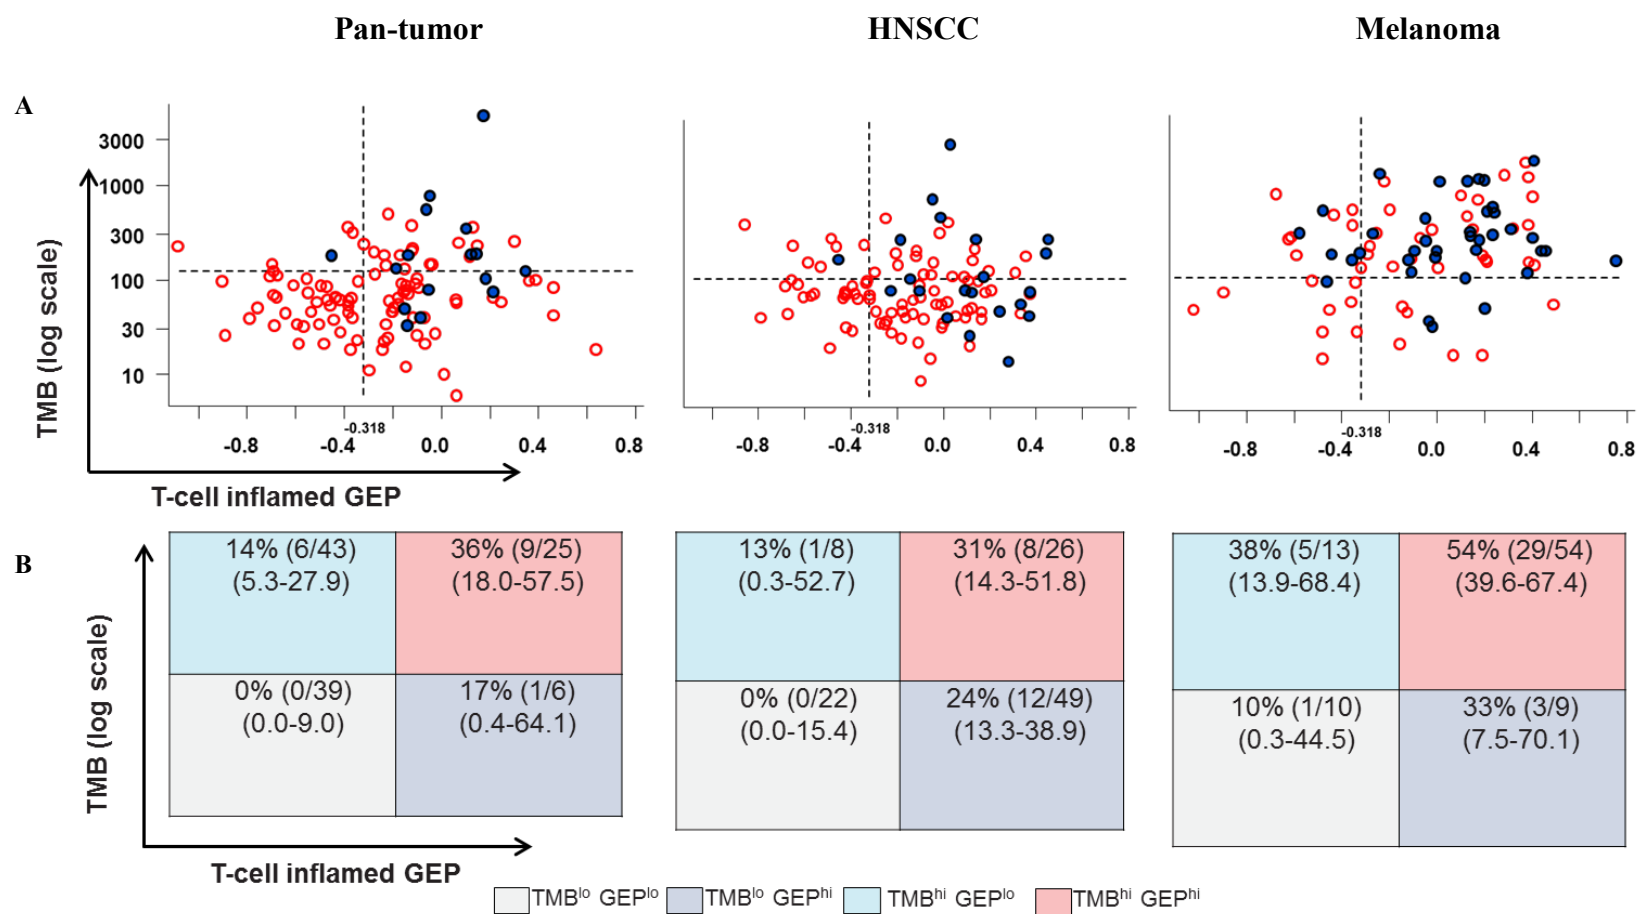

**Fig. S3**

**Relationship between TMB and T cell inflamed GEP with BOR in pan-tumor, HNSCC and Melanoma cohorts at TMB pan-tumor cutoff of 123.** (A) Relationships between TMB and T cell-inflamed GEP with BOR; responder is PR or CR (filled circles); non-responder is not PR or CR (open circles). Dashed horizontal lines represent the clinically applicable TMB threshold (TMB ≥ 123

mutations per exome) derived using GEP and TMB data from each cohort (20). Dashed vertical lines represent a discovery cutoff for the T cell-inflamed GEP selected via analysis of pan-cancer data (15). **(B)** Response (PR or CR) rates (% , n/N for responder/cut-off defined group, 95% CI) per TMB and T cell-inflamed GEP cut-off status as designated in (A). For all cohorts, TMB<sup>hi</sup> and TMB<sup>lo</sup> response groups are defined by the clinically applicable TMB threshold  $\geq$  and  $<$  123, and GEP<sup>hi</sup> and GEP<sup>lo</sup> groups are defined cut-offs  $\geq$  and  $<$  -0.318 respectively. A pan-tumor threshold (20) may be further optimized with additional data beyond those in our study. For example, a pan-tumor TMB threshold of  $\geq 175$  mutations per exome was recently reported for response to pembrolizumab (21).

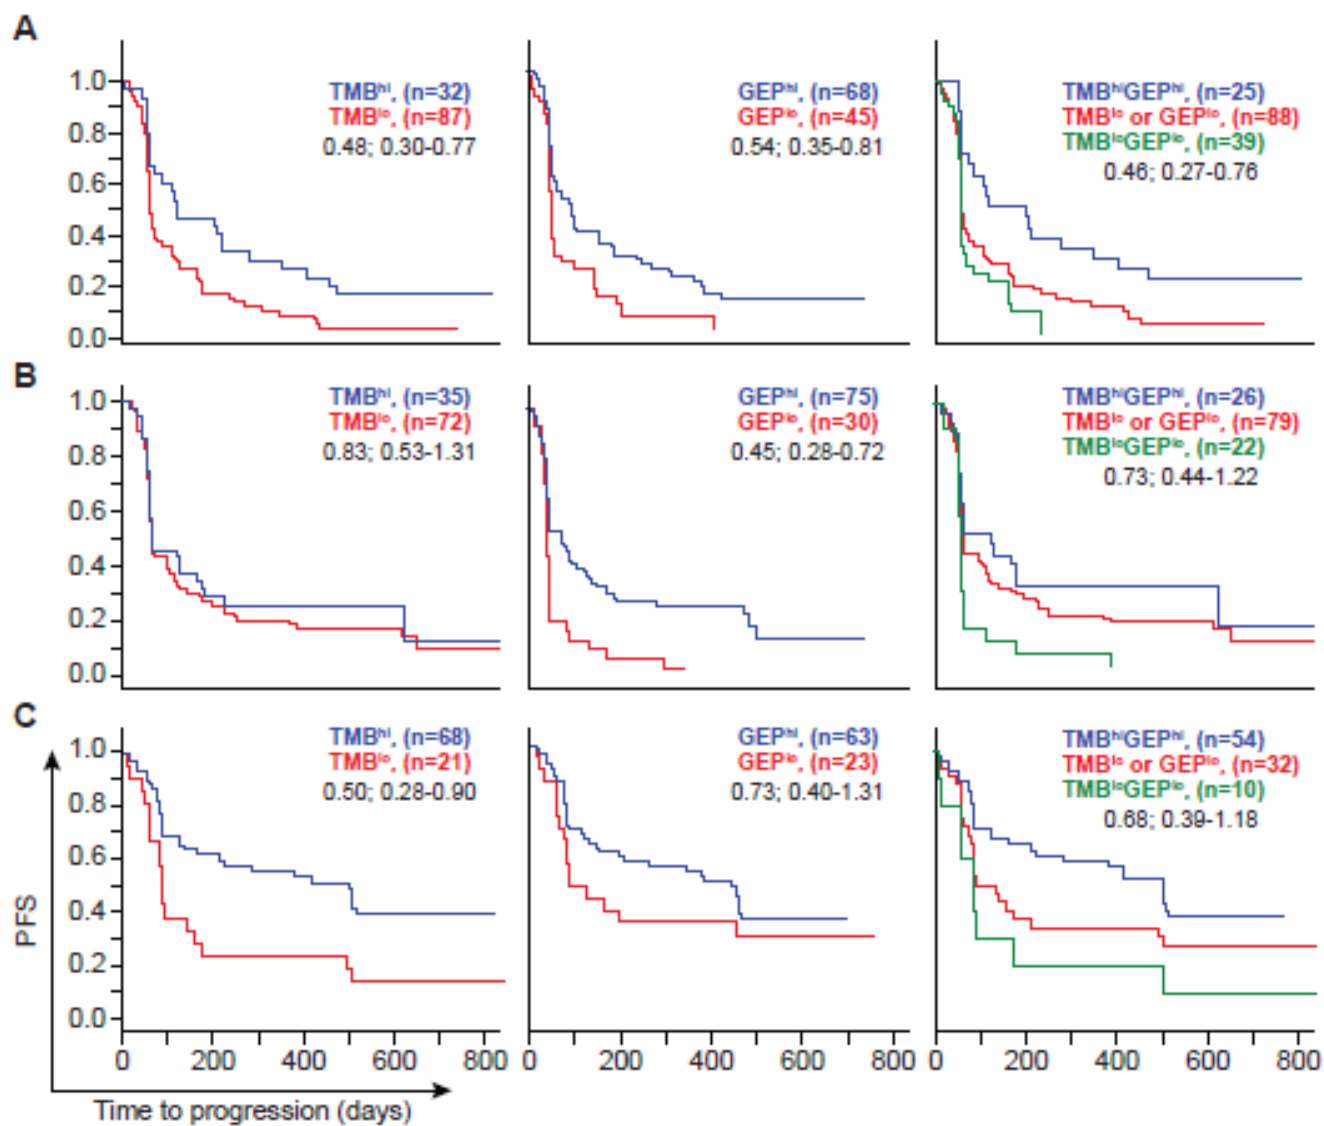



**Fig. S4**

**Relationship between TMB and T-cell-inflamed GEP and PFS in pan-tumor, HNSCC and melanoma cohorts at TMB pan-tumor cutoff of 123.** Relationships between TMB and T cell-inflamed GEP with PFS in all patients-as-treated per TMB and GEP cut-offs as described in Fig. S2. Median PFS in days (hazard ratio; 95% CI) for pan-tumor (A), HNSCC (B) and melanoma (C) cohorts respectively for TMB<sup>hi</sup> vs TMB<sup>lo</sup> are designated.

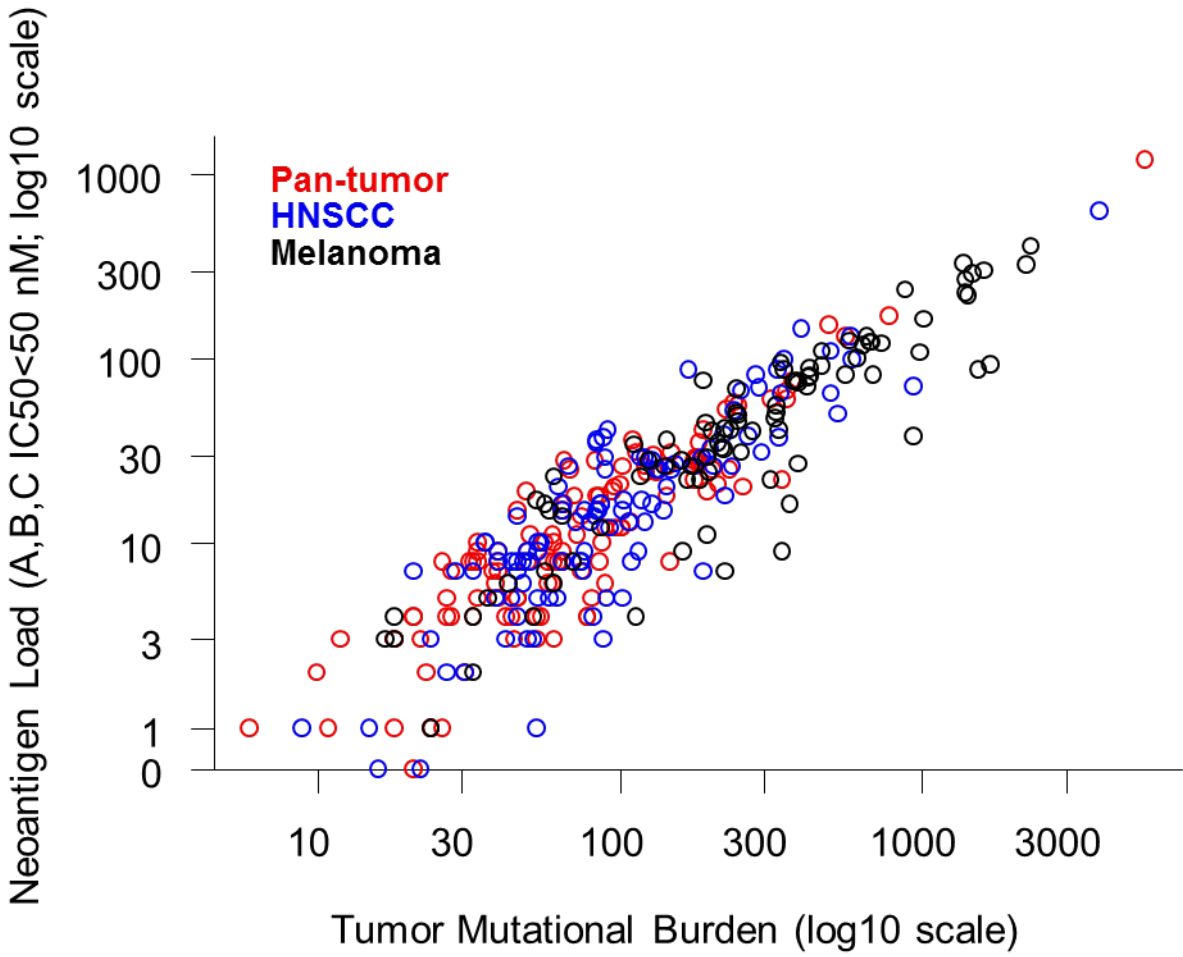

**Fig. S5**

**Relationship between tumor mutational burden (TMB) and neoantigen load.** The x and y axes represent TMB and neoantigen load [ $\log_{10}$ ] respectively and dots represent tumors grouped by the indications used in this study.

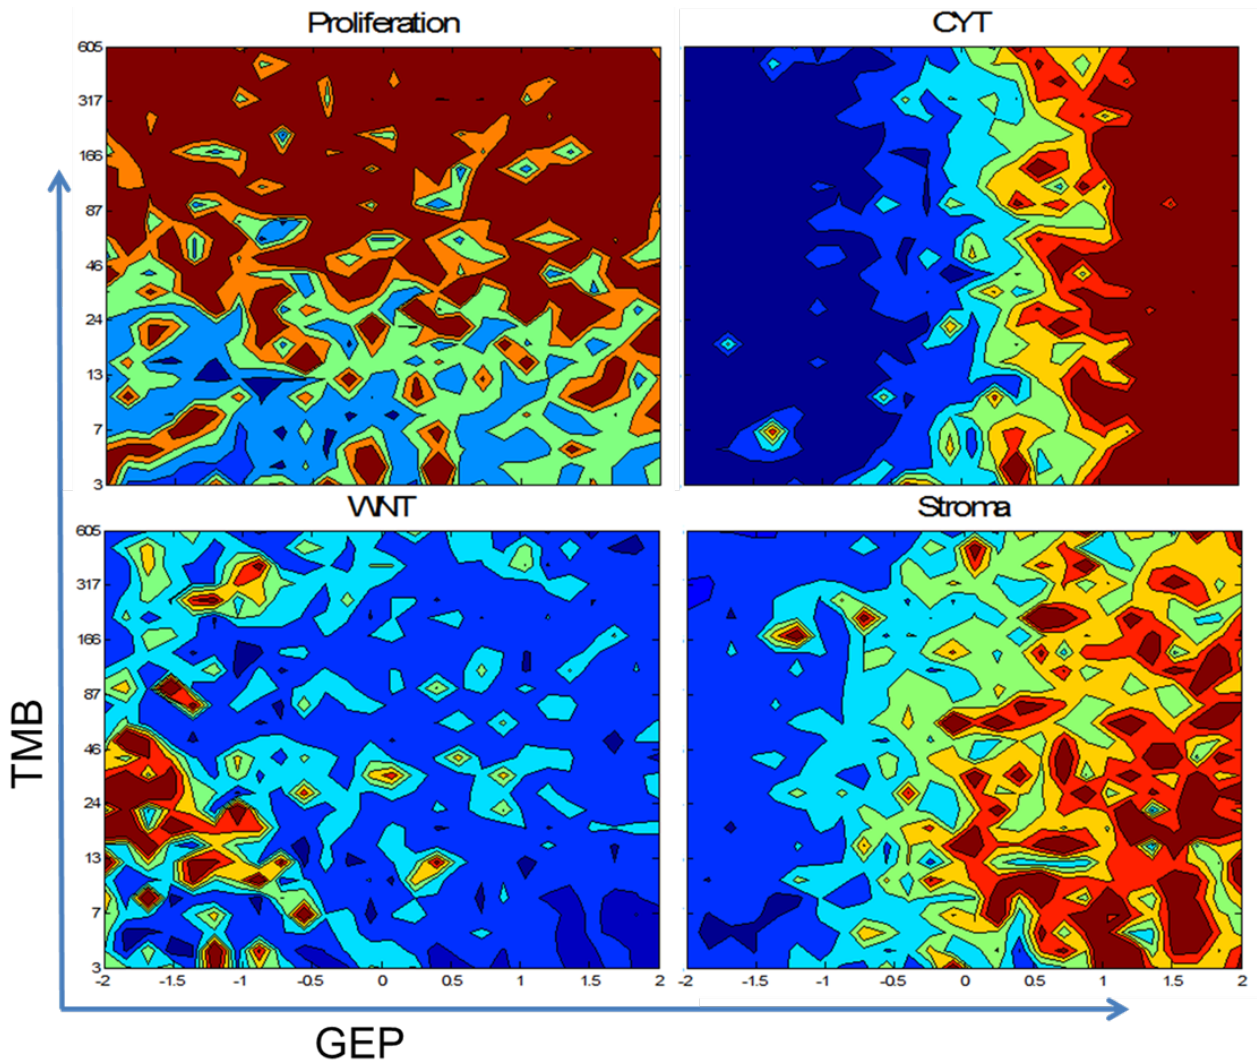

**Fig. S6**

**Association of T-cell-inflamed GEP and TMB with gene signatures in TCGA database.**

Contour plots illustrating association of TMB and GEP with selected patterns of biology represented by previously reported gene signatures (13, 31-33) in the TCGA database. Blue/red represent under/over-expression, respectively.

**Table S1.**  
Baseline characteristics of study cohorts

| <b>Characteristic n (%)</b>                                                                                                                                   | <b>Pan-tumor<br/>KN012/028<br/>N=119</b> | <b>HNSCC<br/>KN012 B1/B2<br/>N=107</b> | <b>Melanoma<br/>KN001/006<br/>N=89</b> |
|---------------------------------------------------------------------------------------------------------------------------------------------------------------|------------------------------------------|----------------------------------------|----------------------------------------|
| Age years median (range)                                                                                                                                      | 62 (23, 86)                              | 61 (25, 83)                            | 60 (30, 88)                            |
| Male                                                                                                                                                          | 52 (43.7)                                | 88 (82.2)                              | 58 (65.2)                              |
| White                                                                                                                                                         | 77 (64.7)                                | 79 (73.8)                              | 86 (96.6)                              |
| Asian                                                                                                                                                         | 26 (21.8)                                | 17 (15.9)                              | 2 (2.2)                                |
| Other                                                                                                                                                         | 16 (13.4)                                | 11 (10.3)                              | 1 (1.1)                                |
| ECOG performance status                                                                                                                                       |                                          |                                        |                                        |
| 0                                                                                                                                                             | 41 (34.5)                                | 36 (33.6)                              | 61 (68.5)                              |
| 1                                                                                                                                                             | 75 (63.0)                                | 71 (66.4)                              | 28 (31.5)                              |
| Unknown                                                                                                                                                       | 3 (2.5)                                  | 0 (0.0)                                | 0 (0.0)                                |
| HPV/EBV status                                                                                                                                                |                                          |                                        |                                        |
| Positive                                                                                                                                                      | 17 (14.3)                                | 34 (31.8)                              | NA                                     |
| Negative                                                                                                                                                      | 102 (85.7)                               | 73 (68.2)                              | NA                                     |
| <i>BRAF</i> V600                                                                                                                                              |                                          |                                        |                                        |
| Wt                                                                                                                                                            | NA                                       | NA                                     | 69 (77.5)                              |
| Mutant                                                                                                                                                        | NA                                       | NA                                     | 20 (22.5)                              |
| ECOG = Eastern Cooperative Oncology Group; EBV = Epstein Barr Virus; HNSCC = head and neck squamous cell carcinoma; HPV = papillomavirus; NA = not applicable |                                          |                                        |                                        |

**Table S2.**

**A. Baseline characteristics of all patients**

| Patient ID | Age | Sex | Tumor Type                              | TMB | GEP*   | Patient ID | Age | Sex | Tumor Type | TMB  | GEP*   |
|------------|-----|-----|-----------------------------------------|-----|--------|------------|-----|-----|------------|------|--------|
| 001        | 68  | M   | Urothelial                              | 180 | -0.451 | 159        | 56  | F   | HNSCC Exp  | 54   | -0.291 |
| 002        | 73  | M   | Urothelial                              | 51  | -0.199 | 160        | 80  | M   | HNSCC Exp  | 204  | -0.455 |
| 003        | 72  | M   | Urothelial                              | 345 | 0.102  | 161        | 55  | F   | HNSCC Exp  | 84   | 0.374  |
| 004        | 67  | M   | Urothelial                              | 372 | -0.122 | 162        | 67  | M   | HNSCC Exp  | 91   | -0.105 |
| 005        | 76  | F   | Urothelial                              | 40  | -0.116 | 163        | 61  | M   | HNSCC Exp  | 65   | -0.179 |
| 006        | 36  | F   | TNBC                                    | 58  | 0.247  | 164        | 76  | M   | HNSCC Exp  | 63   | -0.010 |
| 007        | 42  | F   | TNBC                                    | 23  | -0.347 | 165        | 25  | M   | HNSCC Exp  | 24   | -0.112 |
| 008        | 54  | F   | Gastric                                 | 776 | -0.047 | 166        | 66  | F   | HNSCC Exp  | 55   | 0.103  |
| 009        | 62  | M   | Gastric                                 | 42  | 0.459  | 167        | 78  | M   | HNSCC Exp  | 84   | -0.382 |
| 010        | 61  | M   | Urothelial                              | 86  | -0.499 | 168        | 67  | M   | HNSCC Exp  | 177  | -0.198 |
| 011        | 70  | F   | Urothelial                              | 103 | 0.181  | 169        | 65  | M   | HNSCC Exp  | 90   | -0.042 |
| 012        | 44  | M   | Urothelial                              | 66  | -0.678 | 170        | 67  | M   | HNSCC Exp  | 42   | -0.246 |
| 013        | 74  | M   | Urothelial                              | 122 | -0.691 | 171        | 48  | M   | HNSCC Exp  | 44   | -0.085 |
| 014        | 76  | M   | Urothelial                              | 492 | -0.221 | 172        | 52  | M   | HNSCC Exp  | 502  | NA     |
| 015        | 70  | M   | Urothelial                              | 247 | 0.070  | 173        | 53  | M   | HNSCC Exp  | 50   | -0.131 |
| 016        | 63  | F   | Urothelial                              | 40  | -0.071 | 174        | 51  | M   | HNSCC Exp  | 584  | -0.249 |
| 017        | 78  | M   | Urothelial                              | 231 | 0.145  | 175        | 49  | M   | HNSCC Exp  | 77   | -0.101 |
| 018        | 40  | F   | TNBC                                    | 22  | -0.234 | 176        | 63  | M   | HNSCC Exp  | 148  | -0.297 |
| 019        | 77  | F   | Urothelial                              | 65  | 0.214  | 177        | 47  | M   | HNSCC Exp  | 3893 | 0.029  |
| 020        | 49  | F   | TNBC                                    | 44  | -0.644 | 178        | 54  | M   | HNSCC Exp  | 80   | -0.573 |
| 021        | 29  | F   | TNBC                                    | 66  | -0.437 | 179        | 60  | M   | HNSCC Exp  | 283  | -0.464 |
| 022        | 36  | F   | TNBC                                    | 60  | -0.217 | 180        | 72  | M   | HNSCC Exp  | 526  | 0.019  |
| 023        | 63  | F   | TNBC                                    | 146 | -0.696 | 181        | 48  | F   | HNSCC Exp  | 46   | 0.018  |
| 024        | 67  | M   | Gastric                                 | 186 | 0.124  | 182        | 69  | M   | HNSCC Exp  | 50   | -0.672 |
| 025        | 40  | M   | Gastric                                 | 96  | -0.343 | 183        | 57  | M   | HNSCC Exp  | 36   | -0.421 |
| 026        | 65  | F   | Urothelial                              | 183 | -0.234 | 184        | 59  | F   | HNSCC Exp  | 110  | -0.334 |
| 027        | 78  | M   | Urothelial                              | 100 | 0.390  | 185        | 52  | M   | HNSCC Exp  | 118  | -0.331 |
| 028        | 60  | M   | Urothelial                              | 227 | -1.087 | 186        | 54  | M   | HNSCC Exp  | 153  | 0.196  |
| 029        | 49  | F   | TNBC                                    | 33  | -0.687 | 187        | 52  | M   | HNSCC Exp  | 44   | 0.166  |
| 030        | 50  | F   | TNBC                                    | 102 | -0.556 | 188        | 62  | M   | HNSCC Exp  | 68   | 0.017  |
| 031        | 53  | F   | TNBC                                    | 189 | 0.143  | 189        | 55  | M   | HNSCC Exp  | 36   | -0.009 |
| 032        | 72  | F   | TNBC                                    | 145 | -0.039 | 190        | 52  | M   | HNSCC Exp  | 221  | 0.356  |
| 033        | 68  | F   | TNBC                                    | 6   | 0.063  | 191        | 67  | M   | HNSCC Exp  | 254  | -0.118 |
| 034        | 78  | M   | Gastric                                 | 114 | -0.275 | 192        | 61  | F   | HNSCC Exp  | 76   | -0.435 |
| 035        | 65  | M   | Gastric                                 | 45  | -0.384 | 193        | 46  | M   | HNSCC Exp  | 59   | 0.123  |
| 036        | 68  | F   | Gastric                                 | 130 | -0.152 | 194        | 56  | M   | HNSCC Exp  | 89   | 0.373  |
| 037        | 35  | F   | Gastric                                 | 109 | -0.705 | 195        | 65  | M   | HNSCC Exp  | 92   | 0.208  |
| 038        | 71  | M   | Gastric                                 | 97  | 0.360  | 196        | 60  | F   | HNSCC Exp  | 200  | 0.126  |
| 039        | 72  | M   | Gastric                                 | 27  | NA     | 197        | 49  | M   | HNSCC Exp  | 22   | 0.114  |
| 040        | 64  | M   | Thyroid <sup>†</sup>                    | 50  | -0.756 | 198        | 59  | M   | HNSCC Exp  | 90   | -0.229 |
| 041        | 54  | F   | Carcinoid Tumors                        | 21  | -0.589 | 199        | 68  | M   | HNSCC Exp  | 121  | -0.659 |
| 042        | 75  | F   | Vulvar SCC                              | 57  | 0.063  | 200        | 68  | M   | HNSCC Exp  | 21   | -0.490 |
| 043        | 54  | M   | Salivary Gland                          | 32  | -0.566 | 201        | 64  | M   | HNSCC Exp  | 335  | -0.185 |
| 044        | 49  | F   | Anal Canal SCC                          | 143 | -0.229 | 202        | 59  | M   | HNSCC Exp  | 65   | 0.333  |
| 045        | 55  | M   | Salivary Gland                          | 12  | -0.147 | 203        | 63  | F   | HNSCC Exp  | 48   | 0.370  |
| 046        | 56  | M   | Anal Canal SCC                          | 177 | 0.116  | 204        | 55  | F   | HNSCC Exp  | 46   | -0.791 |
| 047        | 71  | M   | Prostate Adeno                          | 123 | 0.346  | 205        | 44  | M   | HNSCC Exp  | 54   | -0.177 |
| 048        | 47  | F   | Anal Canal SCC                          | 181 | -0.137 | 206        | 65  | M   | HNSCC Exp  | 119  | 0.107  |
| 049        | 73  | M   | Prostate Adeno                          | 65  | -0.180 | 207        | 60  | M   | HNSCC Exp  | 27   | -0.183 |
| 050        | 42  | F   | ER <sup>+</sup> HER <sup>-</sup> Breast | 55  | -0.176 | 208        | 55  | M   | HNSCC Exp  | 188  | -0.584 |
| 051        | 65  | M   | Prostate Adeno                          | 95  | -0.903 | 209        | 52  | M   | HNSCC Exp  | 239  | 0.441  |
| 052        | 50  | F   | Leiomyosarcoma                          | 84  | -0.472 | 210        | 53  | F   | HNSCC Exp  | 116  | 0.151  |
| 053        | 63  | F   | Anal Canal SCC                          | 195 | -0.278 | 211        | 64  | M   | HNSCC Exp  | 297  | -0.345 |
| 054        | 46  | F   | Anal Canal SCC                          | 46  | -0.200 | 212        | 60  | M   | HNSCC Exp  | 33   | -0.393 |
| 055        | 53  | F   | Salivary Gland                          | 81  | -0.093 | 213        | 59  | M   | HNSCC Exp  | 288  | -0.651 |
| 056        | 65  | F   | Biliary Tract Adeno <sup>‡</sup>        | 11  | -0.297 | 214        | 68  | F   | HNSCC Exp  | 107  | -0.632 |
| 057        | 71  | F   | SCLC                                    | 111 | -0.676 | 215        | 55  | F   | HNSCC Exp  | 53   | 0.165  |
| 058        | 76  | F   | Neuroendocrine <sup>§</sup>             | 60  | -0.384 | 216        | 62  | M   | HNSCC Exp  | 223  | -0.120 |
| 059        | 54  | F   | Colon/Rectal Adeno                      | 73  | -0.548 | 217        | 61  | F   | HNSCC Exp  | 16   | -0.057 |
| 060        | 45  | M   | Colon/Rectal Adeno                      | 86  | -0.147 | 218        | 54  | M   | HNSCC Exp  | 15   | 0.281  |
| 061        | 72  | M   | Salivary Gland                          | 61  | 0.058  | 219        | 61  | M   | HNSCC Exp  | 499  | -0.859 |
| 062        | 70  | M   | Salivary Gland                          | 69  | -0.690 | 220        | 73  | M   | HNSCC Exp  | 398  | -0.016 |
| 063        | 36  | F   | ER <sup>+</sup> HER <sup>-</sup> Breast | 75  | -0.157 | 221        | 65  | M   | HNSCC Exp  | 190  | -0.044 |
| 064        | 54  | F   | Anal Canal SCC                          | 183 | -0.171 | 222        | 67  | M   | HNSCC Exp  | 87   | 0.122  |
| 065        | 65  | F   | Biliary Tract Adeno <sup>‡</sup>        | 555 | -0.061 | 223        | 55  | M   | HNSCC Exp  | 89   | -0.429 |
| 066        | 59  | F   | Mesothelioma <sup>¶</sup>               | 24  | -0.223 | 224        | 50  | M   | HNSCC Exp  | 40   | -0.003 |
| 067        | 37  | F   | Cervical SCC                            | 31  | NA     | 225        | 51  | M   | HNSCC Exp  | 340  | 0.451  |
| 068        | 58  | F   | Endometrial                             | 53  | -0.458 | 226        | 71  | M   | HNSCC Exp  | 129  | 0.173  |
| 069        | 69  | F   | Thyroid Cancer                          | 34  | NA     | 227        | 54  | M   | Melanoma   | 1371 | -0.223 |
| 070        | 41  | F   | Cervical SCC                            | 50  | NA     | 228        | 68  | F   | Melanoma   | 18   | 0.067  |
| 071        | 43  | M   | Carcinoid Tumors                        | 28  | -1.427 | 229        | 62  | F   | Melanoma   | 52   | NA     |

| Patient ID | Age | Sex | Tumor Type                            | TMB  | GEP*   | Patient ID | Age | Sex | Tumor Type | TMB  | GEP*   |
|------------|-----|-----|---------------------------------------|------|--------|------------|-----|-----|------------|------|--------|
| 072        | 72  | F   | Carcinoid Tumors                      | 21   | -0.483 | 230        | 70  | M   | Melanoma   | 185  | 0.385  |
| 073        | 66  | M   | Colon/Rectal Adeno                    | 90   | -0.164 | 231        | 86  | M   | Melanoma   | 114  | -0.464 |
| 074        | 55  | F   | Thyroid†                              | 38   | -0.443 | 232        | 56  | M   | Melanoma   | 677  | -0.479 |
| 075        | 73  | F   | Thyroid†                              | 49   | -0.153 | 233        | 74  | M   | Melanoma   | 57   | -1.022 |
| 076        | 23  | M   | Thyroid†                              | 24   | NA     | 234        | 76  | F   | Melanoma   | 162  | 0.004  |
| 077        | 53  | F   | Endometrial                           | 5464 | 0.174  | 235        | 74  | M   | Melanoma   | 1607 | 0.283  |
| 078        | 58  | M   | Carcinoid Tumors                      | 239  | -0.321 | 236        | 71  | F   | Melanoma   | 418  | -0.022 |
| 079        | 43  | F   | Carcinoid Tumors                      | 63   | -0.370 | 237        | 61  | M   | Melanoma   | 248  | 0.435  |
| 080        | 65  | F   | Thyroid†                              | 39   | -0.791 | 238        | 56  | M   | Melanoma   | 2300 | 0.405  |
| 081        | 74  | F   | Endometrial                           | 53   | -0.381 | 239        | 54  | F   | Melanoma   | 112  | -0.345 |
| 082        | 51  | M   | Salivary Gland                        | 26   | -0.102 | 240        | 42  | M   | Melanoma   | 53   | -0.127 |
| 083        | 57  | F   | Carcinoid Tumors                      | 18   | -0.372 | 241        | 63  | M   | Melanoma   | 877  | 0.171  |
| 084        | 48  | M   | Leiomyosarcoma                        | 58   | -0.513 | 242        | 30  | M   | Melanoma   | 253  | 0.165  |
| 085        | 71  | F   | Endometrial                           | 61   | -0.418 | 243        | 67  | F   | Melanoma   | 144  | -0.108 |
| 086        | 55  | F   | Biliary Tract Adeno†                  | 46   | -0.205 | 244        | 64  | M   | Melanoma   | 1015 | -0.677 |
| 087        | 59  | F   | Vulvar SCC                            | 148  | -0.046 | 245        | 88  | F   | Melanoma   | 1392 | 0.129  |
| 088        | 28  | F   | Cervical SCC                          | 46   | -0.536 | 246        | 63  | F   | Melanoma   | 65   | 0.489  |
| 089        | 61  | F   | Vulvar SCC                            | 27   | -0.025 | 247        | 66  | M   | Melanoma   | 689  | -0.200 |
| 090        | 56  | M   | Mesothelioma <sup>¶</sup>             | 10   | 0.011  | 248        | 82  | M   | Melanoma   | 174  | 0.411  |
| 091        | 67  | F   | Mesothelioma <sup>¶</sup>             | 18   | -0.243 | 249        | 54  | M   | Melanoma   | 225  | -0.444 |
| 092        | 68  | M   | Mesothelioma <sup>¶</sup>             | 34   | -0.502 | 250        | 53  | M   | Melanoma   | 469  | 0.384  |
| 093        | 65  | M   | Mesothelioma <sup>¶</sup>             | 255  | 0.299  | 251        | 47  | F   | Melanoma   | 70   | -0.361 |
| 094        | 63  | F   | Colon/Rectal Adeno                    | 88   | -0.611 | 252        | 44  | F   | Melanoma   | 87   | -0.896 |
| 095        | 56  | F   | Anal Canal SCC                        | 75   | 0.213  | 253        | 66  | M   | Melanoma   | 245  | 0.454  |
| 096        | 56  | M   | SCLC                                  | 358  | 0.128  | 254        | 43  | M   | Melanoma   | 1530 | 0.384  |
| 097        | 86  | M   | Mesothelioma <sup>¶</sup>             | 317  | -0.366 | 255        | 60  | M   | Melanoma   | 330  | NA     |
| 098        | 63  | F   | Pancreas Adeno                        | 61   | -0.471 | 256        | 85  | F   | Melanoma   | 18   | 0.188  |
| 099        | 58  | F   | SCLC                                  | 83   | 0.460  | 257        | 53  | F   | Melanoma   | 276  | -0.282 |
| 100        | 52  | F   | Mesothelioma <sup>¶</sup>             | 40   | -0.086 | 258        | 34  | M   | Melanoma   | 377  | -0.270 |
| 101        | 65  | M   | Esophageal SCC/<br>Adeno <sup>‡</sup> | 132  | -0.187 | 259        | 57  | F   | Melanoma   | 212  | -0.009 |
| 102        | 40  | F   | Esophageal SCC/<br>Adeno <sup>‡</sup> | 90   | -0.107 | 260        | 76  | F   | Melanoma   | 61   | NA     |
| 103        | 62  | M   | Esophageal SCC/<br>Adeno <sup>‡</sup> | 34   | -0.596 | 261        | 76  | M   | Melanoma   | 197  | -0.119 |
| 104        | 58  | M   | Salivary Gland                        | 178  | NA     | 262        | 55  | M   | Melanoma   | 168  | -0.187 |
| 105        | 66  | M   | Salivary Gland                        | 79   | -0.055 | 263        | 43  | M   | Melanoma   | 248  | -0.095 |
| 106        | 53  | M   | Pancreas Adeno                        | 21   | -0.069 | 264        | 66  | M   | Melanoma   | 636  | 0.240  |
| 107        | 70  | M   | Biliary Tract Adeno†                  | 33   | -0.140 | 265        | 77  | M   | Melanoma   | 607  | -0.434 |
| 108        | 51  | M   | Biliary Tract Adeno†                  | 102  | -0.102 | 266        | 39  | M   | Melanoma   | 160  | -0.318 |
| 109        | 72  | M   | Salivary Gland                        | 34   | -0.229 | 267        | 76  | M   | Melanoma   | 329  | -0.624 |
| 110        | 64  | F   | Thyroid†                              | 28   | -0.415 | 268        | 65  | M   | Melanoma   | 246  | -0.003 |
| 111        | 66  | M   | Salivary Gland                        | 79   | -0.147 | 269        | 64  | M   | Melanoma   | 43   | -0.034 |
| 112        | 65  | F   | Biliary Tract Adeno†                  | 18   | 0.637  | 270        | 66  | M   | Melanoma   | 203  | -0.109 |
| 113        | 67  | F   | Thyroid†                              | 26   | -0.891 | 271        | 64  | M   | Melanoma   | 326  | 0.175  |
| 114        | 60  | M   | Thyroid†                              | 65   | -0.437 | 272        | 59  | F   | Melanoma   | 341  | -0.072 |
| 115        | 67  | F   | Colon/Rectal Adeno                    | 71   | -0.137 | 273        | 65  | M   | Melanoma   | 392  | 0.137  |
| 116        | 47  | F   | Anal Canal SCC                        | 202  | -0.122 | 274        | 31  | M   | Melanoma   | 190  | 0.209  |
| 117        | 64  | M   | Mesothelioma <sup>¶</sup>             | 213  | -0.118 | 275        | 43  | M   | Melanoma   | 17   | -0.483 |
| 118        | 53  | M   | Mesothelioma <sup>¶</sup>             | 40   | -0.367 | 276        | 52  | F   | Melanoma   | 385  | -0.579 |
| 119        | 53  | F   | SCLC                                  | 358  | -0.386 | 277        | 68  | F   | Melanoma   | 219  | 0.192  |
| 120        | 50  | M   | HNSCC                                 | 132  | 0.037  | 278        | 57  | F   | Melanoma   | 33   | -0.481 |
| 121        | 67  | M   | HNSCC                                 | 40   | -0.274 | 279        | 70  | M   | Melanoma   | 1474 | 0.174  |
| 122        | 63  | M   | HNSCC                                 | 39   | -0.251 | 280        | 52  | M   | Melanoma   | 986  | 0.100  |
| 123        | 66  | M   | HNSCC                                 | 54   | 0.242  | 281        | 64  | F   | Melanoma   | 344  | -0.612 |
| 124        | 65  | M   | HNSCC                                 | 62   | NA     | 282        | 33  | M   | Melanoma   | 658  | 0.210  |
| 125        | 69  | M   | HNSCC                                 | 103  | -0.686 | 283        | 64  | F   | Melanoma   | 364  | 0.233  |
| 126        | 52  | M   | HNSCC                                 | 237  | -0.207 | 284        | 62  | F   | Melanoma   | 117  | -0.525 |
| 127        | 76  | M   | HNSCC                                 | 46   | -0.165 | 285        | 71  | M   | Melanoma   | 142  | 0.378  |
| 128        | 72  | F   | HNSCC                                 | 144  | 0.309  | 286        | 71  | M   | Melanoma   | 225  | -0.293 |
| 129        | 64  | F   | HNSCC                                 | 9    | -0.097 | 287        | 74  | M   | Melanoma   | 221  | -0.590 |
| 130        | 52  | M   | HNSCC                                 | 87   | 0.181  | 288        | 54  | M   | Melanoma   | 389  | -0.254 |
| 131        | 83  | M   | HNSCC                                 | 941  | -0.046 | 289        | 58  | F   | Melanoma   | 351  | 0.140  |
| 132        | 69  | M   | HNSCC                                 | 84   | -0.417 | 290        | 60  | M   | Melanoma   | 126  | 0.120  |
| 133        | 72  | M   | HNSCC                                 | 82   | -0.320 | 291        | 49  | F   | Melanoma   | 197  | -0.358 |
| 134        | 58  | M   | HNSCC                                 | 83   | -0.429 | 292        | 76  | M   | Melanoma   | 465  | -0.354 |
| 135        | 70  | M   | HNSCC                                 | 140  | -0.088 | 293        | 44  | M   | Melanoma   | 1423 | 0.198  |
| 136        | 68  | F   | HNSCC                                 | 85   | -0.558 | 294        | 73  | M   | Melanoma   | 1685 | -0.241 |
| 137        | 39  | M   | HNSCC                                 | 29   | 0.112  | 295        | 59  | F   | Melanoma   | 683  | -0.355 |
| 138        | 72  | M   | HNSCC                                 | 103  | -0.393 | 296        | 55  | F   | Melanoma   | 193  | 0.751  |
| 139        | 60  | M   | HNSCC                                 | 65   | -0.030 | 297        | 69  | M   | Melanoma   | 428  | 0.319  |
| 140        | 62  | M   | HNSCC                                 | 170  | -0.531 | 298        | 81  | M   | Melanoma   | 2221 | 0.372  |

| Patient ID | Age | Sex | Tumor Type | TMB | GEP*   | Patient ID | Age | Sex | Tumor Type | TMB  | GEP*   |
|------------|-----|-----|------------|-----|--------|------------|-----|-----|------------|------|--------|
| 141        | 71  | M   | HNSCC      | 51  | 0.335  | 299        | 69  | F   | Melanoma   | 937  | 0.399  |
| 142        | 74  | F   | HNSCC      | 74  | -0.319 | 300        | 57  | M   | Melanoma   | 61   | -0.146 |
| 143        | 70  | M   | HNSCC      | 104 | -0.103 | 301        | 73  | F   | Melanoma   | 198  | 0.205  |
| 144        | 51  | M   | HNSCC      | 122 | -0.142 | 302        | 52  | M   | Melanoma   | 57   | -0.453 |
| 145        | 63  | F   | HNSCC      | 342 | 0.142  | 303        | 43  | M   | Melanoma   | 740  | 0.235  |
| 146        | 63  | M   | HNSCC      | 77  | -0.605 | 304        | 56  | M   | Melanoma   | 317  | -0.046 |
| 147        | 62  | M   | HNSCC      | 31  | -0.227 | 305        | 60  | M   | Melanoma   | 578  | 0.126  |
| 148        | 62  | M   | HNSCC      | 52  | -0.227 | 306        | 56  | M   | Melanoma   | 421  | 0.308  |
| 149        | 50  | M   | HNSCC      | 590 | -0.014 | 307        | 38  | M   | Melanoma   | 340  | 0.401  |
| 150        | 74  | M   | HNSCC      | 75  | -0.372 | 308        | 55  | M   | Melanoma   | 1388 | 0.011  |
| 151        | 57  | M   | HNSCC      | 136 | -0.053 | 309        | 47  | F   | Melanoma   | 59   | 0.201  |
| 152        | 69  | M   | HNSCC      | 350 | -0.485 | 310        | 68  | F   | Melanoma   | 24   | -0.157 |
| 153        | 66  | M   | HNSCC      | 46  | 0.094  | 311        | 42  | F   | Melanoma   | 33   | -0.338 |
| 154        | 62  | M   | HNSCC Exp  | 48  | 0.053  | 312        | 60  | M   | Melanoma   | 233  | -0.327 |
| 155        | 49  | M   | HNSCC Exp  | 129 | 0.090  | 313        | 51  | M   | Melanoma   | 557  | -0.051 |
| 156        | 71  | M   | HNSCC Exp  | 93  | 0.093  | 314        | 45  | F   | Melanoma   | 37   | -0.021 |
| 157        | 54  | M   | HNSCC Exp  | 72  | -0.131 | 315        | 46  | M   | Melanoma   | 425  | 0.150  |
| 158        | 60  | F   | HNSCC Exp  | 267 | 0.135  | -          | -   | -   | -          | -    | -      |

Adeno=Adenocarcinoma; ER+HER- Breast= Estrogen Receptor Positive Human Epidermal Growth Factor Receptor-2 Negative Breast Cancer; Ext=extension study; PNET=pancreatic neuroendocrine tumors; SCC=squamous cell carcinoma; TNBC=triple-negative breast cancer. \*GEP scores were calculated using gene data listed in Table S2B. †Papillary/Follicular; ‡ Gallbladder+Biliary Tree, excluding Ampulla of Vater; § Well/moderately differentiated PNET; ¶ Malignant Pleural; †† Including GE Junction















| Patient ID | Housekeeping Genes |        |          |      |        |      |       |           |      |     | Predictor Genes |      |      |       |       |      |        |       |       |          |          |       |      |      |      |          |        |       |       |
|------------|--------------------|--------|----------|------|--------|------|-------|-----------|------|-----|-----------------|------|------|-------|-------|------|--------|-------|-------|----------|----------|-------|------|------|------|----------|--------|-------|-------|
|            | STK11P             | ZBTB34 | TBC1D10B | OAZ1 | POLR2A | G6PD | ABCF1 | C14orf102 | UBB  | TBP | SDHA            | CCL5 | CD27 | CD274 | CD276 | CD8A | CMKLR1 | CXCL9 | CXCR6 | HLA.DQA1 | HLA.DRB1 | HLA.E | IDO1 | LAG3 | NGK7 | PDCD1LG2 | PSMB10 | STAT1 | TIGIT |
| 305        | 83                 | 110    | 113      | 3087 | 932    | 381  | 335   | 102       | 4675 | 128 | 1579            | 165  | 523  | 64    | 1124  | 144  | 178    | 451   | 29    | 2019     | 7301     | 5772  | 166  | 93   | 153  | 50       | 327    | 2718  | 285   |
| 306        | 151                | 491    | 213      | 5857 | 1404   | 489  | 561   | 102       | 9594 | 363 | 2259            | 1339 | 1476 | 116   | 493   | 485  | 381    | 2171  | 175   | 10249    | 19873    | 7168  | 659  | 270  | 1913 | 119      | 712    | 3734  | 685   |
| 307        | 63                 | 121    | 107      | 2846 | 938    | 432  | 516   | 55        | 5907 | 131 | 1050            | 1224 | 416  | 53    | 1159  | 547  | 374    | 1274  | 203   | 2645     | 8048     | 5659  | 132  | 493  | 953  | 63       | 381    | 2976  | 223   |
| 308        | 78                 | 171    | 76       | 2460 | 539    | 395  | 287   | 66        | 2212 | 157 | 808             | 289  | 135  | 54    | 751   | 128  | 351    | 939   | 36    | 13       | 992      | 3666  | 87   | 78   | 198  | 94       | 155    | 1479  | 63    |
| 309        | 53                 | 26     | 10       | 127  | 201    | 68   | 52    | 25        | 171  | 33  | 351             | 56   | 196  | 23    | 42    | 87   | 52     | 35    | 7     | 852      | 1419     | 503   | 116  | 28   | 42   | 5        | 131    | 181   | 24    |
| 310        | 10                 | 12     | 2        | 99   | 98     | 59   | 24    | 7         | 290  | 8   | 508             | 24   | 24   | 7     | 89    | 18   | 17     | 24    | 2     | 9        | 84       | 228   | 10   | 5    | 17   | 3        | 16     | 88    | 4     |
| 311        | 28                 | 129    | 48       | 1117 | 368    | 126  | 294   | 27        | 4088 | 32  | 494             | 90   | 32   | 21    | 506   | 18   | 22     | 186   | 4     | 339      | 513      | 722   | 70   | 19   | 27   | 8        | 57     | 846   | 18    |
| 312        | 173                | 259    | 222      | 5547 | 995    | 961  | 802   | 154       | 7321 | 455 | 1682            | 276  | 69   | 68    | 3667  | 145  | 172    | 1241  | 41    | 1722     | 3091     | 5047  | 118  | 79   | 193  | 65       | 215    | 2569  | 73    |
| 313        | 174                | 192    | 168      | 6477 | 1382   | 414  | 582   | 129       | 8524 | 230 | 1827            | 519  | 99   | 117   | 1256  | 179  | 289    | 727   | 43    | 6313     | 7009     | 5413  | 209  | 97   | 299  | 56       | 336    | 4071  | 85    |
| 314        | 40                 | 81     | 39       | 1521 | 307    | 143  | 135   | 41        | 1854 | 76  | 396             | 126  | 196  | 43    | 279   | 84   | 101    | 134   | 8     | 6        | 532      | 1729  | 139  | 43   | 75   | 33       | 123    | 569   | 59    |
| 315        | 66                 | 144    | 86       | 2475 | 907    | 324  | 615   | 93        | 4741 | 119 | 1558            | 547  | 112  | 64    | 1040  | 319  | 221    | 3878  | 57    | 1085     | 5585     | 4268  | 458  | 106  | 322  | 57       | 180    | 1975  | 123   |

STK11P = Serine/threonine-protein kinase 11-interacting protein; ZBTB34 = Zinc finger and BTB domain-containing protein 34; TBC1D10B = TBC1 domain family member 10B; OAZ1 = Ornithine decarboxylase antizyme 1; POLR2A = DNA-directed RNA polymerase II subunit RPB1; G6PD = glucose-6-phosphate dehydrogenase; ABCF1 = ATP-binding cassette sub-family F member 1; C14orf102 = Chromosome 14 open reading frame 102-like protein; UBB = Ubiquitin; TBP = TATA-box binding protein; SDHA = succinate dehydrogenase complex flavoprotein subunit A; CCL5 = Chemokine (C-C motif) ligand 5; CD27 = CD27L receptor; PD-L1 (CD274) = programmed death ligand 1, CD274 molecule; CD276 (B7-H3) = CD276 antigen; CD8A = Cluster of differentiation 8a; CMKLR1 = Chemokine-like receptor 1; CXCL9 = Chemokine C-X-C motif ligand 9; CXCR6 = Chemokine C-X-C motif receptor 6; HLA.DQA1 = Major histocompatibility complex class II DQ alpha 1; HLA.DRB1 = Major histocompatibility complex class II DR beta 1; HLA.E = Major histocompatibility complex class I E;IDO1 = Indoleamine 2-3-dioxygenase 1; LAG3 = Lymphocyte-activation gene 3; NKG7 = Natural killer cell group 7 sequence; PDL2 (PDCD1LG2) = Programmed cell death 1 ligand 2; PSMB10 = Proteasome subunit beta type 10; STAT1 = Signal transducer and activator of transcription 1; TIGIT = T cell immunoreceptor with Ig and ITIM domains. GEP scores listed in Table S2A were computed by first normalizing the raw counts by subtracting the average of the log10 counts of the house-keeping genes from the log10 count of each of the predictor genes, and then a weighted sum of the normalized predictor gene values was calculated using the weights for each of the 18 genes (CCL5=0.008346; CD27=0.072293; CD274=0.042853; CD276=-0.0239; CD8A=0.031021; CMKLR1=0.151253; CXCL9=0.074135; CXCR6=0.004313; HLA.DQA1=0.020091; HLA.DRB1=0.058806; HLA.E=0.07175; IDO1=0.060679; LAG3=0.123895; NKG7=0.075524; PDCD1LG2=0.003734; PSMB10=0.032999; STAT1=0.250229; TIGIT=0.084767).

**Table S3.**

Tumor types and dominant mutational signatures in BOR Analysis

| Study #                                                                                                                                                                                                                                                                                                                                                                                                                                                                                                                              | Cohort                                   | Total (N) | Responders (n) | Dominant mutational signature (tumors with high TMB) |        |
|--------------------------------------------------------------------------------------------------------------------------------------------------------------------------------------------------------------------------------------------------------------------------------------------------------------------------------------------------------------------------------------------------------------------------------------------------------------------------------------------------------------------------------------|------------------------------------------|-----------|----------------|------------------------------------------------------|--------|
| KN028                                                                                                                                                                                                                                                                                                                                                                                                                                                                                                                                | Colon or rectal                          | 5         | 0              | Low TMB                                              |        |
|                                                                                                                                                                                                                                                                                                                                                                                                                                                                                                                                      | Anal                                     | 8         | 2              | APOBEC                                               |        |
|                                                                                                                                                                                                                                                                                                                                                                                                                                                                                                                                      | Pancreas                                 | 2         | 0              | Low TMB                                              |        |
|                                                                                                                                                                                                                                                                                                                                                                                                                                                                                                                                      | Esophageal                               | 3         | 1              | Low TMB                                              |        |
|                                                                                                                                                                                                                                                                                                                                                                                                                                                                                                                                      | Biliary                                  | 6         | 2              | MMR                                                  |        |
|                                                                                                                                                                                                                                                                                                                                                                                                                                                                                                                                      | Carcinoid                                | 6         | 0              | Other                                                |        |
|                                                                                                                                                                                                                                                                                                                                                                                                                                                                                                                                      | Neuroendocrine                           | 1         | 0              | Low TMB                                              |        |
|                                                                                                                                                                                                                                                                                                                                                                                                                                                                                                                                      | ER <sup>+</sup> HER2 <sup>-</sup> Breast | 2         | 0              | HRD                                                  |        |
|                                                                                                                                                                                                                                                                                                                                                                                                                                                                                                                                      | Endometrial                              | 4         | 1              | POLE                                                 |        |
|                                                                                                                                                                                                                                                                                                                                                                                                                                                                                                                                      | Cervical                                 | 3         | 0              | APOBEC                                               |        |
|                                                                                                                                                                                                                                                                                                                                                                                                                                                                                                                                      | Vulvar                                   | 3         | 0              | APOBEC                                               |        |
|                                                                                                                                                                                                                                                                                                                                                                                                                                                                                                                                      | Small cell lung cancer                   | 4         | 0              | Smoking                                              |        |
|                                                                                                                                                                                                                                                                                                                                                                                                                                                                                                                                      | Mesothelioma                             | 9         | 1              | Other                                                |        |
|                                                                                                                                                                                                                                                                                                                                                                                                                                                                                                                                      | Thyroid                                  | 9         | 1              | Other                                                |        |
|                                                                                                                                                                                                                                                                                                                                                                                                                                                                                                                                      | Salivary gland                           | 10        | 1              | APOBEC                                               |        |
|                                                                                                                                                                                                                                                                                                                                                                                                                                                                                                                                      | Leiomyosarcoma                           | 2         | 0              | Smoking                                              |        |
|                                                                                                                                                                                                                                                                                                                                                                                                                                                                                                                                      | Prostate                                 | 3         | 1              | MMR                                                  |        |
|                                                                                                                                                                                                                                                                                                                                                                                                                                                                                                                                      | KN012                                    | Gastric   | 10             | 2                                                    | MMR    |
|                                                                                                                                                                                                                                                                                                                                                                                                                                                                                                                                      |                                          | TNBC      | 12             | 1                                                    | HRD    |
|                                                                                                                                                                                                                                                                                                                                                                                                                                                                                                                                      |                                          | Bladder   | 17             | 3                                                    | APOBEC |
| KN028/012                                                                                                                                                                                                                                                                                                                                                                                                                                                                                                                            | Combined                                 | 119       | 16             | Heterogeneous                                        |        |
| KN012                                                                                                                                                                                                                                                                                                                                                                                                                                                                                                                                | HNSCC                                    | 107       | 21             | APOBEC                                               |        |
| KN001, 006                                                                                                                                                                                                                                                                                                                                                                                                                                                                                                                           | Melanoma                                 | 89        | 38             | UV exposure                                          |        |
|                                                                                                                                                                                                                                                                                                                                                                                                                                                                                                                                      | All combined cohorts                     | 315       | 75             | Heterogeneous                                        |        |
| <p>The major mutational signatures displayed above as previously reported are the dominant signatures identified in the patient samples in this dataset (16). APOBEC=apolipoprotein B mRNA editing enzyme, catalytic polypeptide-like; ER=estrogen receptor; HER2=human epidermal growth factor 2; HNSCC=head and neck squamous cell carcinoma; HRD=homologous recombination deficiency; MMR=DNA mismatch repair; POLE=DNA polymerase epsilon catalytic subunit; TMB=tumor mutational burden; TNBC=triple negative breast cancer</p> |                                          |           |                |                                                      |        |

**Table S4.**

Association of mutational signatures with BOR and PFS in pan-tumor cohort

| Measure of Mutation                                                                                                                                                                                                                                                                                                                                                                                                                                                                                                                                           | One-sided Nominal <i>P</i> -values |                |
|---------------------------------------------------------------------------------------------------------------------------------------------------------------------------------------------------------------------------------------------------------------------------------------------------------------------------------------------------------------------------------------------------------------------------------------------------------------------------------------------------------------------------------------------------------------|------------------------------------|----------------|
|                                                                                                                                                                                                                                                                                                                                                                                                                                                                                                                                                               | All subjects as treated            |                |
|                                                                                                                                                                                                                                                                                                                                                                                                                                                                                                                                                               | BOR<br>N = 119                     | PFS<br>N = 119 |
| WES TMB (log scale)                                                                                                                                                                                                                                                                                                                                                                                                                                                                                                                                           | 0.001                              | 0.017          |
| DNA repair panel including HRD (any vs no mutation in panel)                                                                                                                                                                                                                                                                                                                                                                                                                                                                                                  | 0.037                              | 0.155          |
| Neoantigen signature (HLA-A,B binding <50nM, log-scale)                                                                                                                                                                                                                                                                                                                                                                                                                                                                                                       | 0.001                              | 0.021          |
| Smoking signature (log scale)                                                                                                                                                                                                                                                                                                                                                                                                                                                                                                                                 | 0.001                              | 0.018          |
| TP53 mutation                                                                                                                                                                                                                                                                                                                                                                                                                                                                                                                                                 | 0.637                              | 0.030          |
| Fraction of APOBEC- driven mutations                                                                                                                                                                                                                                                                                                                                                                                                                                                                                                                          | 0.226                              | 0.319          |
| Specific nucleotide change: sum C to A                                                                                                                                                                                                                                                                                                                                                                                                                                                                                                                        | 0.144                              | 0.119          |
| Specific nucleotide change: sum C to G                                                                                                                                                                                                                                                                                                                                                                                                                                                                                                                        | 0.102                              | 0.116          |
| Specific nucleotide change: sum C to T                                                                                                                                                                                                                                                                                                                                                                                                                                                                                                                        | 0.004                              | 0.020          |
| Specific nucleotide change: sum T to A                                                                                                                                                                                                                                                                                                                                                                                                                                                                                                                        | 0.008                              | 0.041          |
| Specific nucleotide change: sum T to C                                                                                                                                                                                                                                                                                                                                                                                                                                                                                                                        | 0.029                              | 0.056          |
| Specific nucleotide change: sum T to G                                                                                                                                                                                                                                                                                                                                                                                                                                                                                                                        | 0.015                              | 0.052          |
| <p>APOBEC=apolipoprotein B mRNA editing enzyme; HLA=human leukocyte antigen; HRD=Homologous recombination deficiency; TMB=tumor mutational burden; WES=whole exome sequencing. Logistic regression testing and Cox models were used for BOR and PFS, respectively. Models included terms for study (KN012/KN028) and baseline ECOG status (0 versus <math>\geq 1</math>). APOBEC assessed only in Anal, Bladder, Breast and Cervical cancers. All mutational measures were tested for association with increased BOR and PFS, with the exception of TP53.</p> |                                    |                |



**Table S5.**

Gene enrichment in Sets 1 and 2

**Genes with correlations >0.6**

| <b>Keyword</b>                                                       | <b>Source</b>     | <b>Pvalue</b> | <b>Evalue</b> |
|----------------------------------------------------------------------|-------------------|---------------|---------------|
| Allograft Rejection Signaling (445lc)                                | IngenuityPathways | 2.89E-42      | 5.25E-38      |
| Immune response_Inhibitory PD-1 signaling in T cells                 | GeneGo            | 5.16E-41      | 9.38E-37      |
| Immune response_Differentiation and clonal expansion of CD8+ T cells | GeneGo            | 2.94E-39      | 5.35E-35      |
| NK cells in allergic contact dermatitis                              | GeneGo            | 4.49E-39      | 8.16E-35      |
| Immune response_Immunological synapse formation                      | GeneGo            | 8.08E-38      | 1.47E-33      |
| Immune response_Th1 and Th2 cell differentiation                     | GeneGo            | 2.16E-37      | 3.93E-33      |

**Genes with correlations >0.15 and <0.6**

| <b>Keyword</b>                                                                         | <b>Source</b>     | <b>Pvalue</b> | <b>Evalue</b> |
|----------------------------------------------------------------------------------------|-------------------|---------------|---------------|
| Role of Macrophages_ Fibroblasts and Endothelial Cells in Rheumatoid Arthritis (4ctnm) | IngenuityPathways | 1.04E-27      | 1.89E-23      |
| TREM1 Signaling (3j6wq)                                                                | IngenuityPathways | 3.36E-26      | 6.10E-22      |
| Cell adhesion_Chemokines and adhesion                                                  | GeneGo            | 6.94E-25      | 1.26E-20      |
| Granulocyte Adhesion and Diapedesis (8tsni)                                            | IngenuityPathways | 1.03E-24      | 1.87E-20      |
| Agranulocyte Adhesion and Diapedesis (8tsnh)                                           | IngenuityPathways | 1.80E-23      | 3.28E-19      |
| Cytokine-cytokine receptor interaction                                                 | kegg              | 9.87E-23      | 1.79E-18      |
| B Cell Receptor Signaling (cil)                                                        | IngenuityPathways | 1.96E-19      | 3.57E-15      |
| Immune response_Inflammasome in inflammatory response                                  | GeneGo            | 2.13E-19      | 3.87E-15      |
| Atherosclerosis Signaling (4ctne)                                                      | IngenuityPathways | 2.82E-19      | 5.13E-15      |
| Release of pro-inflammatory factors and proteases by alveolar macrophages in asthma    | GeneGo            | 2.93E-19      | 5.32E-15      |
| Hepatic Fibrosis _ Hepatic Stellate Cell Activation (1nilk)                            | IngenuityPathways | 7.50E-19      | 1.36E-14      |
| Cell adhesion_ECM remodeling                                                           | GeneGo            | 1.57E-18      | 2.85E-14      |
| Role of Pattern Recognition Receptors in Recognition of Bacteria and Viruses (3j6wo)   | IngenuityPathways | 1.58E-18      | 2.88E-14      |

**Table S6.**  
General group annotation of genes in modules

| <b>General annotation</b> |                         |
|---------------------------|-------------------------|
| 1                         | Anti-bacterial defense  |
| 2                         | ECM remodeling          |
| 3                         | Keratins and MMPs       |
| 4                         | Proliferation           |
| 5                         | Vasculature             |
| 6                         | Wound healing           |
| 7                         | PMNs                    |
| 8                         | B-cell receptor (I)     |
| 9                         | B-cell receptor (II)    |
| 10                        | Cytoskeleton remodeling |

**Table S7.**

Gene annotation (TCGA database)

**Annotation of genes with average correlation with TMB in GEP+ <-0.2**1425 genes: Key annotation (cell cyc, kegg, Ingenuity, genego): **Vasculature**

| Name                                                                                       | Source    | EValue   | PValue   |
|--------------------------------------------------------------------------------------------|-----------|----------|----------|
| Vascular smooth muscle contraction                                                         | kegg      | 1.50E-05 | 8.08E-09 |
| GABA Receptor Signaling (cih)                                                              | Ingenuity | 6.70E-05 | 3.66E-08 |
| Development_Alpha-1 adrenergic receptors signaling via cAMP                                | GeneGo    | 0.00011  | 5.84E-08 |
| Cellular Effects of Sildenafil Viagra (3v731)                                              | Ingenuity | 0.00014  | 7.86E-08 |
| Role of NFAT in Cardiac Hypertrophy (4uiun)                                                | Ingenuity | 0.00018  | 9.92E-08 |
| Muscle contraction_GPCRs in the regulation of smooth muscle tone                           | GeneGo    | 0.00019  | 1.06E-07 |
| G-Protein Coupled Receptor Signaling (cj8)                                                 | Ingenuity | 0.00052  | 2.84E-07 |
| Relaxin Signaling (3v73l)                                                                  | Ingenuity | 0.00068  | 3.73E-07 |
| Regulation of intrinsic membrane properties and excitability of cortical pyramidal neurons | GeneGo    | 0.00083  | 4.57E-07 |

**Annotation of genes with average correlation with TMB in GEP+ >0.2**1921 genes: Key annotation (cell cyc, kegg, Ingenuity, genego): **Cell cycle (proliferation)**

| Name                                                                                                      | Source  | EValue   | PValue   |
|-----------------------------------------------------------------------------------------------------------|---------|----------|----------|
| G2                                                                                                        | cellcyc | 7.00E-22 | 3.83E-25 |
| G2/M                                                                                                      | cellcyc | 3.30E-21 | 1.81E-24 |
| Cell cycle_The metaphase checkpoint                                                                       | GeneGo  | 6.50E-20 | 3.58E-23 |
| Cell cycle_Role of APC in cell cycle regulation                                                           | GeneGo  | 1.30E-17 | 7.37E-21 |
| Cell cycle_Transition and termination of DNA replication                                                  | GeneGo  | 6.00E-17 | 3.28E-20 |
| HSP70 and HSP40-dependent folding in Huntington's disease                                                 | GeneGo  | 6.80E-15 | 3.73E-18 |
| Putative pathways of MHC class I-dependent postsynaptic long-term depression in major depressive disorder | GeneGo  | 1.20E-14 | 6.30E-18 |
| DNA replication                                                                                           | kegg    | 3.60E-14 | 1.99E-17 |
| Immune response_Antigen presentation by MHC class I                                                       | GeneGo  | 1.20E-13 | 6.41E-17 |
| Ubiquitin-proteasome system in Huntington's disease                                                       | GeneGo  | 2.70E-13 | 1.46E-16 |
| Cell cycle                                                                                                | kegg    | 9.30E-13 | 5.08E-16 |

## References and Notes

1. S. J. Lee, B.-C. Jang, S.-W. Lee, Y.-I. Yang, S.-I. Suh, Y.-M. Park, S. Oh, J.-G. Shin, S. Yao, L. Chen, I.-H. Choi, Interferon regulatory factor-1 is prerequisite to the constitutive expression and IFN-gamma-induced upregulation of B7-H1 (CD274). *FEBS Lett.* **580**, 755–762 (2006). [doi:10.1016/j.febslet.2005.12.093](https://doi.org/10.1016/j.febslet.2005.12.093) [Medline](#)
2. C. Lu, P. S. Redd, J. R. Lee, N. Savage, K. Liu, The expression profiles and regulation of PD-L1 in tumor-induced myeloid-derived suppressor cells. *Oncoimmunology* **5**, e1247135 (2016). [doi:10.1080/2162402X.2016.1247135](https://doi.org/10.1080/2162402X.2016.1247135) [Medline](#)
3. J. M. Taube, A. Klein, J. R. Brahmer, H. Xu, X. Pan, J. H. Kim, L. Chen, D. M. Pardoll, S. L. Topalian, R. A. Anders, Association of PD-1, PD-1 ligands, and other features of the tumor immune microenvironment with response to anti-PD-1 therapy. *Clin. Cancer Res.* **20**, 5064–5074 (2014). [doi:10.1158/1078-0432.CCR-13-3271](https://doi.org/10.1158/1078-0432.CCR-13-3271) [Medline](#)
4. A. Snyder, V. Makarov, T. Merghoub, J. Yuan, J. M. Zaretsky, A. Desrichard, L. A. Walsh, M. A. Postow, P. Wong, T. S. Ho, T. J. Hollmann, C. Bruggeman, K. Kannan, Y. Li, C. Elipenahli, C. Liu, C. T. Harbison, L. Wang, A. Ribas, J. D. Wolchok, T. A. Chan, Genetic basis for clinical response to CTLA-4 blockade in melanoma. *N. Engl. J. Med.* **371**, 2189–2199 (2014). [doi:10.1056/NEJMoa1406498](https://doi.org/10.1056/NEJMoa1406498) [Medline](#)
5. E. M. Van Allen, D. Miao, B. Schilling, S. A. Shukla, C. Blank, L. Zimmer, A. Sucker, U. Hillen, M. H. G. Foppen, S. M. Goldinger, J. Utikal, J. C. Hassel, B. Weide, K. C. Kaehler, C. Loquai, P. Mohr, R. Gutzmer, R. Dummer, S. Gabriel, C. J. Wu, D. Schadendorf, L. A. Garraway, Genomic correlates of response to CTLA-4 blockade in metastatic melanoma. *Science* **350**, 207–211 (2015). [doi:10.1126/science.aad0095](https://doi.org/10.1126/science.aad0095) [Medline](#)
6. W. Hugo, J. M. Zaretsky, L. Sun, C. Song, B. H. Moreno, S. Hu-Lieskovan, B. Berent-Maoz, J. Pang, B. Chmielowski, G. Cherry, E. Seja, S. Lomeli, X. Kong, M. C. Kelley, J. A. Sosman, D. B. Johnson, A. Ribas, R. S. Lo, Genomic and transcriptomic features of response to anti-PD-1 therapy in metastatic melanoma. *Cell* **165**, 35–44 (2016). [doi:10.1016/j.cell.2016.02.065](https://doi.org/10.1016/j.cell.2016.02.065) [Medline](#)
7. D. B. Johnson, M. H. Pollack, J. A. Sosman, Emerging targeted therapies for melanoma. *Expert Opin. Emerg. Drugs* **21**, 195–207 (2016). [doi:10.1080/14728214.2016.1184644](https://doi.org/10.1080/14728214.2016.1184644) [Medline](#)
8. N. A. Rizvi, M. D. Hellmann, A. Snyder, P. Kvistborg, V. Makarov, J. J. Havel, W. Lee, J. Yuan, P. Wong, T. S. Ho, M. L. Miller, N. Rekhtman, A. L. Moreira, F. Ibrahim, C. Bruggeman, B. Gasmi, R. Zappasodi, Y. Maeda, C. Sander, E. B. Garon, T. Merghoub, J. D. Wolchok, T. N. Schumacher, T. A. Chan, Mutational landscape determines sensitivity to PD-1 blockade in non-small cell lung cancer. *Science* **348**, 124–128 (2015). [doi:10.1126/science.aaa1348](https://doi.org/10.1126/science.aaa1348) [Medline](#)
9. M. Kowanetz, W. Zou, D. S. Shames, C. Cummings, N. Rizvi, A. I. Spira, G. M. Frampton, V. Leveque, S. Flynn, S. Mocci, G. Shankar, R. Funke, M. Ballinger, D. Waterkamp, A. Sandler, G. Hampton, L. Amler, P. S. Hegde, M. Hellmann, Tumor mutation load assessed by FoundationOne (FM1) is associated with improved efficacy of atezolizumab

- (atezo) in patients with advanced NSCLC. *Ann. Oncol.* **27**, 77P (2016).  
[doi:10.1093/annonc/mdw363.25](https://doi.org/10.1093/annonc/mdw363.25)
10. D. T. Le, J. N. Durham, K. N. Smith, H. Wang, B. R. Bartlett, L. K. Aulakh, S. Lu, H. Kemberling, C. Wilt, B. S. Lubner, F. Wong, N. S. Azad, A. A. Rucki, D. Laheru, R. Donehower, A. Zaheer, G. A. Fisher, T. S. Crocenzi, J. J. Lee, T. F. Greten, A. G. Duffy, K. K. Ciombor, A. D. Eyring, B. H. Lam, A. Joe, S. P. Kang, M. Holdhoff, L. Danilova, L. Cope, C. Meyer, S. Zhou, R. M. Goldberg, D. K. Armstrong, K. M. Bever, A. N. Fader, J. Taube, F. Housseau, D. Spetzler, N. Xiao, D. M. Pardoll, N. Papadopoulos, K. W. Kinzler, J. R. Eshleman, B. Vogelstein, R. A. Anders, L. A. Diaz Jr., Mismatch repair deficiency predicts response of solid tumors to PD-1 blockade. *Science* **357**, 409–413 (2017). [doi:10.1126/science.aan6733](https://doi.org/10.1126/science.aan6733) [Medline](#)
  11. D. T. Le, J. N. Uram, H. Wang, B. R. Bartlett, H. Kemberling, A. D. Eyring, A. D. Skora, B. S. Lubner, N. S. Azad, D. Laheru, B. Biedrzycki, R. C. Donehower, A. Zaheer, G. A. Fisher, T. S. Crocenzi, J. J. Lee, S. M. Duffy, R. M. Goldberg, A. de la Chapelle, M. Koshiji, F. Bhajee, T. Huebner, R. H. Hruban, L. D. Wood, N. Cuka, D. M. Pardoll, N. Papadopoulos, K. W. Kinzler, S. Zhou, T. C. Cornish, J. M. Taube, R. A. Anders, J. R. Eshleman, B. Vogelstein, L. A. Diaz Jr., PD-1 blockade in tumors with mismatch-repair deficiency. *N. Engl. J. Med.* **372**, 2509–2520 (2015). [doi:10.1056/NEJMoa1500596](https://doi.org/10.1056/NEJMoa1500596) [Medline](#)
  12. J. E. Rosenberg, J. Hoffman-Censits, T. Powles, M. S. van der Heijden, A. V. Balar, A. Necchi, N. Dawson, P. H. O'Donnell, A. Balmanoukian, Y. Loriot, S. Srinivas, M. M. Retz, P. Grivas, R. W. Joseph, M. D. Galsky, M. T. Fleming, D. P. Petrylak, J. L. Perez-Gracia, H. A. Burris, D. Castellano, C. Canil, J. Bellmunt, D. Bajorin, D. Nickles, R. Bourgon, G. M. Frampton, N. Cui, S. Mariathasan, O. Abidoye, G. D. Fine, R. Dreicer, Atezolizumab in patients with locally advanced and metastatic urothelial carcinoma who have progressed following treatment with platinum-based chemotherapy: A single-arm, multicentre, phase 2 trial. *Lancet* **387**, 1909–1920 (2016). [doi:10.1016/S0140-6736\(16\)00561-4](https://doi.org/10.1016/S0140-6736(16)00561-4) [Medline](#)
  13. M. S. Rooney, S. A. Shukla, C. J. Wu, G. Getz, N. Hacohen, Molecular and genetic properties of tumors associated with local immune cytolytic activity. *Cell* **160**, 48–61 (2015). [doi:10.1016/j.cell.2014.12.033](https://doi.org/10.1016/j.cell.2014.12.033) [Medline](#)
  14. P. C. Tumeh, C. L. Harview, J. H. Yearley, I. P. Shintaku, E. J. M. Taylor, L. Robert, B. Chmielowski, M. Spasic, G. Henry, V. Ciobanu, A. N. West, M. Carmona, C. Kivork, E. Seja, G. Cherry, A. J. Gutierrez, T. R. Grogan, C. Mateus, G. Tomasic, J. A. Glaspy, R. O. Emerson, H. Robins, R. H. Pierce, D. A. Elashoff, C. Robert, A. Ribas, PD-1 blockade induces responses by inhibiting adaptive immune resistance. *Nature* **515**, 568–571 (2014). [doi:10.1038/nature13954](https://doi.org/10.1038/nature13954) [Medline](#)
  15. M. Ayers, J. Lunceford, M. Nebozhyn, E. Murphy, A. Loboda, D. R. Kaufman, A. Albright, J. D. Cheng, S. P. Kang, V. Shankaran, S. A. Piha-Paul, J. Yearley, T. Y. Seiwert, A. Ribas, T. K. McClanahan, IFN- $\gamma$ -related mRNA profile predicts clinical response to PD-1 blockade. *J. Clin. Invest.* **127**, 2930–2940 (2017). [doi:10.1172/JCI91190](https://doi.org/10.1172/JCI91190) [Medline](#)
  16. The Cancer Genome Atlas, TCGA Data Portal; <https://tcga-data.nci.nih.gov/docs/publications/tcga/>.

17. L. B. Alexandrov, M. R. Stratton, Mutational signatures: The patterns of somatic mutations hidden in cancer genomes. *Curr. Opin. Genet. Dev.* **24**, 52–60 (2014).  
[doi:10.1016/j.gde.2013.11.014](https://doi.org/10.1016/j.gde.2013.11.014) [Medline](#)
18. R. Haddad, T. Y. Seiwert, L. Q. M. Chow, S. Gupta, J. Weiss, I. Gluck, J. P. Eder, B. Burtneess, M. Tahara, B. Keam, H. Kang, K. Muro, A. Albright, L. Huang, M. Ayers, R. Mogg, R. Cristescu, J. D. Cheng, R. Mehra, Genomic determinants of response to pembrolizumab in head and neck squamous cell carcinoma. *J. Clin. Oncol.* **35** (Suppl.), 6009 (2017). [doi:10.1200/JCO.2017.35.15\\_suppl.6009](https://doi.org/10.1200/JCO.2017.35.15_suppl.6009)
19. D. B. Johnson, G. M. Frampton, M. J. Rioth, E. Yusko, Y. Xu, X. Guo, R. C. Ennis, D. Fabrizio, Z. R. Chalmers, J. Greenbowe, S. M. Ali, S. Balasubramanian, J. X. Sun, Y. He, D. T. Frederick, I. Puzanov, J. M. Balko, J. M. Cates, J. S. Ross, C. Sanders, H. Robins, Y. Shyr, V. A. Miller, P. J. Stephens, R. J. Sullivan, J. A. Sosman, C. M. Lovly, Targeted next generation sequencing identifies markers of response to PD-1 blockade. *Cancer Immunol. Res.* **4**, 959–967 (2016). [doi:10.1158/2326-6066.CIR-16-0143](https://doi.org/10.1158/2326-6066.CIR-16-0143) [Medline](#)
20. A. Panda, A. Betigeri, K. Subramanian, J. S. Ross, D. C. Pavlick, S. Ali, P. Markowski, A. Silk, H. L. Kaufman, E. Lattime, J. M. Mehnert, R. Sullivan, C. M. Lovly, J. Sosman, D. B. Johnson, G. Bhanot, S. Ganesan, Identifying a clinically applicable mutational burden threshold as a potential biomarker of response to immune checkpoint therapy in solid tumors. *JCO Precis. Oncol.* **2017**, 10.1200/PO.17.00146 (2017). [Medline](#)
21. T. Y. Seiwert, R. Haddad, J. Bauml, J. Weiss, D. G. Pfister, S. Gupta, R. Mehra, I. Gluck, H. Kang, F. Worden, J. P. Eder, M. Tahara, B. Burtneess, S. V. Liu, A. Webber, L. Huang, R. Mogg, R. Cristescu, J. Cheng, L. Q. Chow, “Biomarkers predictive of response to pembrolizumab in head and neck cancer (HNSCC),” in *Proceedings of the American Association for Cancer Research Annual Meeting 2018*, Chicago, IL, 14 to 18 April 2018 (American Association for Cancer Research, 2018), abstract no. LB-339.
22. S. J. Salipante, S. M. Scroggins, H. L. Hampel, E. H. Turner, C. C. Pritchard, Microsatellite instability detection by next generation sequencing. *Clin. Chem.* **60**, 1192–1199 (2014).  
[doi:10.1373/clinchem.2014.223677](https://doi.org/10.1373/clinchem.2014.223677) [Medline](#)
23. W. Roh, P.-L. Chen, A. Reuben, C. N. Spencer, P. A. Prieto, J. P. Miller, V. Gopalakrishnan, F. Wang, Z. A. Cooper, S. M. Reddy, C. Gumbs, L. Little, Q. Chang, W.-S. Chen, K. Wani, M. P. De Macedo, E. Chen, J. L. Austin-Breneman, H. Jiang, J. Roszik, M. T. Tetzlaff, M. A. Davies, J. E. Gershenwald, H. Tawbi, A. J. Lazar, P. Hwu, W.-J. Hwu, A. Diab, I. C. Glitza, S. P. Patel, S. E. Woodman, R. N. Amaria, V. G. Prieto, J. Hu, P. Sharma, J. P. Allison, L. Chin, J. Zhang, J. A. Wargo, P. A. Futreal, Integrated molecular analysis of tumor biopsies on sequential CTLA-4 and PD-1 blockade reveals markers of response and resistance. *Sci. Transl. Med.* **9**, eaah3560 (2017).  
[doi:10.1126/scitranslmed.aah3560](https://doi.org/10.1126/scitranslmed.aah3560) [Medline](#)
24. N. McGranahan, A. J. S. Furness, R. Rosenthal, S. Ramskov, R. Lyngaa, S. K. Saini, M. Jamal-Hanjani, G. A. Wilson, N. J. Birkbak, C. T. Hiley, T. B. K. Watkins, S. Shafi, N. Murugaesu, R. Mitter, A. U. Akarca, J. Linares, T. Marafioti, J. Y. Henry, E. M. Van Allen, D. Miao, B. Schilling, D. Schadendorf, L. A. Garraway, V. Makarov, N. A. Rizvi, A. Snyder, M. D. Hellmann, T. Merghoub, J. D. Wolchok, S. A. Shukla, C. J. Wu, K. S. Peggs, T. A. Chan, S. R. Hadrup, S. A. Quezada, C. Swanton, Clonal neoantigens elicit T

- cell immunoreactivity and sensitivity to immune checkpoint blockade. *Science* **351**, 1463–1469 (2016). [doi:10.1126/science.aaf1490](https://doi.org/10.1126/science.aaf1490) [Medline](#)
25. E. B. Garon, N. A. Rizvi, R. Hui, N. Leighl, A. S. Balmanoukian, J. P. Eder, A. Patnaik, C. Aggarwal, M. Gubens, L. Horn, E. Carcereny, M.-J. Ahn, E. Felip, J.-S. Lee, M. D. Hellmann, O. Hamid, J. W. Goldman, J.-C. Soria, M. Dolled-Filhart, R. Z. Rutledge, J. Zhang, J. K. Luceford, R. Rangwala, G. M. Lubiniecki, C. Roach, K. Emancipator, L. Gandhi, KEYNOTE-001 Investigators, Pembrolizumab for the treatment of non-small-cell lung cancer. *N. Engl. J. Med.* **372**, 2018–2028 (2015). [doi:10.1056/NEJMoa1501824](https://doi.org/10.1056/NEJMoa1501824) [Medline](#)
  26. C. Robert, J. Schachter, G. V. Long, A. Arance, J. J. Grob, L. Mortier, A. Daud, M. S. Carlino, C. McNeil, M. Lotem, J. Larkin, P. Lorigan, B. Neyns, C. U. Blank, O. Hamid, C. Mateus, R. Shapira-Frommer, M. Kosh, H. Zhou, N. Ibrahim, S. Ebbinghaus, A. Ribas, KEYNOTE-006 Investigators, Pembrolizumab versus ipilimumab in advanced melanoma. *N. Engl. J. Med.* **372**, 2521–2532 (2015). [doi:10.1056/NEJMoa1503093](https://doi.org/10.1056/NEJMoa1503093) [Medline](#)
  27. M. R. Neagu, D. A. Reardon, An update on the role of immunotherapy and vaccine strategies for primary brain tumors. *Curr. Treat. Options Oncol.* **16**, 54 (2015). [doi:10.1007/s11864-015-0371-3](https://doi.org/10.1007/s11864-015-0371-3) [Medline](#)
  28. U. Vaishampayan, Therapeutic options and multifaceted treatment paradigms in metastatic castrate-resistant prostate cancer. *Curr. Opin. Oncol.* **26**, 265–273 (2014). [doi:10.1097/CCO.0000000000000066](https://doi.org/10.1097/CCO.0000000000000066) [Medline](#)
  29. D. Coppola, M. Nebozhyn, F. Khalil, H. Dai, T. Yeatman, A. Loboda, J. J. Mulé, Unique ectopic lymph node-like structures present in human primary colorectal carcinoma are identified by immune gene array profiling. *Am. J. Pathol.* **179**, 37–45 (2011). [doi:10.1016/j.ajpath.2011.03.007](https://doi.org/10.1016/j.ajpath.2011.03.007) [Medline](#)
  30. J. Galon, H. K. Angell, D. Bedognetti, F. M. Marincola, The continuum of cancer immunosurveillance: Prognostic, predictive, and mechanistic signatures. *Immunity* **39**, 11–26 (2013). [doi:10.1016/j.immuni.2013.07.008](https://doi.org/10.1016/j.immuni.2013.07.008) [Medline](#)
  31. M. Łuksza, N. Riaz, V. Makarov, V. P. Balachandran, M. D. Hellmann, A. Solovyov, N. A. Rizvi, T. Merghoub, A. J. Levine, T. A. Chan, J. D. Wolchok, B. D. Greenbaum, A neoantigen fitness model predicts tumour response to checkpoint blockade immunotherapy. *Nature* **551**, 517–520 (2017). [Medline](#)
  32. H. Dai, L. van't Veer, J. Lamb, Y. D. He, M. Mao, B. M. Fine, R. Bernards, M. van de Vijver, P. Deutsch, A. Sachs, R. Stoughton, S. Friend, A cell proliferation signature is a marker of extremely poor outcome in a subpopulation of breast cancer patients. *Cancer Res.* **65**, 4059–4066 (2005). [doi:10.1158/0008-5472.CAN-04-3953](https://doi.org/10.1158/0008-5472.CAN-04-3953) [Medline](#)
  33. S. Spranger, R. Bao, T. F. Gajewski, Melanoma-intrinsic  $\beta$ -catenin signalling prevents anti-tumour immunity. *Nature* **523**, 231–235 (2015). [doi:10.1038/nature14404](https://doi.org/10.1038/nature14404) [Medline](#)
  34. K. Yoshihara, M. Shahmoradgoli, E. Martínez, R. Vegesna, H. Kim, W. Torres-Garcia, V. Treviño, H. Shen, P. W. Laird, D. A. Levine, S. L. Carter, G. Getz, K. Stemke-Hale, G. B. Mills, R. G. W. Verhaak, Inferring tumour purity and stromal and immune cell

- admixture from expression data. *Nat. Commun.* **4**, 2612 (2013). [doi:10.1038/ncomms3612](https://doi.org/10.1038/ncomms3612) [Medline](#)
35. A. C. Huang, M. A. Postow, R. J. Orlowski, R. Mick, B. Bengsch, S. Manne, W. Xu, S. Harmon, J. R. Giles, B. Wenz, M. Adamow, D. Kuk, K. S. Panageas, C. Carrera, P. Wong, F. Quagliarello, B. Wubbenhorst, K. D'Andrea, K. E. Pauken, R. S. Herati, R. P. Staupé, J. M. Schenkel, S. McGettigan, S. Kothari, S. M. George, R. H. Vonderheide, R. K. Amaravadi, G. C. Karakousis, L. M. Schuchter, X. Xu, K. L. Nathanson, J. D. Wolchok, T. C. Gangadhar, E. J. Wherry, T-cell invigoration to tumour burden ratio associated with anti-PD-1 response. *Nature* **545**, 60–65 (2017). [doi:10.1038/nature22079](https://doi.org/10.1038/nature22079) [Medline](#)
  36. P. F. Robbins, Y.-C. Lu, M. El-Gamil, Y. F. Li, C. Gross, J. Gartner, J. C. Lin, J. K. Teer, P. Cliften, E. Tycksen, Y. Samuels, S. A. Rosenberg, Mining exomic sequencing data to identify mutated antigens recognized by adoptively transferred tumor-reactive T cells. *Nat. Med.* **19**, 747–752 (2013). [doi:10.1038/nm.3161](https://doi.org/10.1038/nm.3161) [Medline](#)
  37. N. H. Segal, D. W. Parsons, K. S. Peggs, V. Velculescu, K. W. Kinzler, B. Vogelstein, J. P. Allison, Epitope landscape in breast and colorectal cancer. *Cancer Res.* **68**, 889–892 (2008). [doi:10.1158/0008-5472.CAN-07-3095](https://doi.org/10.1158/0008-5472.CAN-07-3095) [Medline](#)
  38. H. Matsushita, M. D. Vesely, D. C. Koboldt, C. G. Rickert, R. Uppaluri, V. J. Magrini, C. D. Arthur, J. M. White, Y.-S. Chen, L. K. Shea, J. Hundal, M. C. Wendl, R. Demeter, T. Wylie, J. P. Allison, M. J. Smyth, L. J. Old, E. R. Mardis, R. D. Schreiber, Cancer exome analysis reveals a T-cell-dependent mechanism of cancer immunoediting. *Nature* **482**, 400–404 (2012). [doi:10.1038/nature10755](https://doi.org/10.1038/nature10755) [Medline](#)
  39. M. Dolled-Filhart, C. Roach, G. Toland, D. Stanforth, M. Jansson, G. M. Lubiniecki, G. Ponto, K. Emancipator, Development of a companion diagnostic for pembrolizumab in non-small cell lung cancer using immunohistochemistry for programmed death ligand-1. *Arch. Pathol. Lab. Med.* **140**, 1243–1249 (2016). [doi:10.5858/arpa.2015-0542-OA](https://doi.org/10.5858/arpa.2015-0542-OA) [Medline](#)
  40. L. Q. Chow, B. Burtneß, J. Weiss, R. Berger, J. P. Eder, E. J. Gonzalez, J. Pulini, J. Johnson, M. Dolled-Filhart, K. Emancipator, J. K. Luceford, K. Pathiraja, C. Gause, J. D. Cheng, T. Seiwert, A phase Ib study of pembrolizumab (pembro; MK-3475) in patients (pts) with human papillomavirus virus (HPV)-positive and negative head and neck cancer (HNC). *Ann. Oncol.* **25** (Suppl. 4), 14 (2014). [doi:10.1093/annonc/mdu438.32](https://doi.org/10.1093/annonc/mdu438.32)
  41. T. Y. Seiwert, B. Burtneß, R. Mehra, J. Weiss, R. Berger, J. P. Eder, K. Heath, T. McClanahan, J. Luceford, C. Gause, J. D. Cheng, L. Q. Chow, Safety and clinical activity of pembrolizumab for treatment of recurrent or metastatic squamous cell carcinoma of the head and neck (KEYNOTE-012): An open-label, multicentre, phase 1b trial. *Lancet Oncol.* **17**, 956–965 (2016). [doi:10.1016/S1470-2045\(16\)30066-3](https://doi.org/10.1016/S1470-2045(16)30066-3) [Medline](#)
  42. O. Hamid, C. Robert, A. Daud, F. S. Hodi, W.-J. Hwu, R. Kefford, J. D. Wolchok, P. Hersey, R. W. Joseph, J. S. Weber, R. Dronca, T. C. Gangadhar, A. Patnaik, H. Zarour, A. M. Joshua, K. Gergich, J. Ellassaïss-Schaap, A. Algazi, C. Mateus, P. Boasberg, P. C. Tumeh, B. Chmielowski, S. W. Ebbinghaus, X. N. Li, S. P. Kang, A. Ribas, Safety and tumor responses with lambrolizumab (anti-PD-1) in melanoma. *N. Engl. J. Med.* **369**, 134–144 (2013). [doi:10.1056/NEJMoa1305133](https://doi.org/10.1056/NEJMoa1305133) [Medline](#)



43. H. Li, R. Durbin, Fast and accurate short read alignment with Burrows-Wheeler transform. *Bioinformatics* **25**, 1754–1760 (2009). [doi:10.1093/bioinformatics/btp324](https://doi.org/10.1093/bioinformatics/btp324) [Medline](#)
44. A. McKenna, M. Hanna, E. Banks, A. Sivachenko, K. Cibulskis, A. Kernytsky, K. Garimella, D. Altshuler, S. Gabriel, M. Daly, M. A. DePristo, The Genome Analysis Toolkit: A MapReduce framework for analyzing next-generation DNA sequencing data. *Genome Res.* **20**, 1297–1303 (2010). [doi:10.1101/gr.107524.110](https://doi.org/10.1101/gr.107524.110) [Medline](#)
45. K. Cibulskis, M. S. Lawrence, S. L. Carter, A. Sivachenko, D. Jaffe, C. Sougnez, S. Gabriel, M. Meyerson, E. S. Lander, G. Getz, Sensitive detection of somatic point mutations in impure and heterogeneous cancer samples. *Nat. Biotechnol.* **31**, 213–219 (2013). [doi:10.1038/nbt.2514](https://doi.org/10.1038/nbt.2514) [Medline](#)
46. S. T. Sherry, M. Ward, K. Sirotkin, dbSNP-database for single nucleotide polymorphisms and other classes of minor genetic variation. *Genome Res.* **9**, 677–679 (1999). [Medline](#)
47. S. A. Forbes, G. Tang, N. Bindal, S. Bamford, E. Dawson, C. Cole, C. Y. Kok, M. Jia, R. Ewing, A. Menzies, J. W. Teague, M. R. Stratton, P. A. Futreal, COSMIC (the Catalogue of Somatic Mutations in Cancer): A resource to investigate acquired mutations in human cancer. *Nucleic Acids Res.* **38**, D652–D657 (2010). [doi:10.1093/nar/gkp995](https://doi.org/10.1093/nar/gkp995) [Medline](#)
48. A. Szolek, B. Schubert, C. Mohr, M. Sturm, M. Feldhahn, O. Kohlbacher, OptiType: Precision HLA typing from next-generation sequencing data. *Bioinformatics* **30**, 3310–3316 (2014). [doi:10.1093/bioinformatics/btu548](https://doi.org/10.1093/bioinformatics/btu548) [Medline](#)
49. M. Nielsen, C. Lundegaard, P. Worning, S. L. Lauemøller, K. Lamberth, S. Buus, S. Brunak, O. Lund, Reliable prediction of T-cell epitopes using neural networks with novel sequence representations. *Protein Sci.* **12**, 1007–1017 (2003). [doi:10.1110/ps.0239403](https://doi.org/10.1110/ps.0239403) [Medline](#)
50. O. Lund, M. Nielsen, C. Kesmir, A. G. Petersen, C. Lundegaard, P. Worning, C. Sylvester-Hvid, K. Lamberth, G. Røder, S. Justesen, S. Buus, S. Brunak, Definition of supertypes for HLA molecules using clustering of specificity matrices. *Immunogenetics* **55**, 797–810 (2004). [doi:10.1007/s00251-004-0647-4](https://doi.org/10.1007/s00251-004-0647-4) [Medline](#)
51. J. Sidney, B. Peters, N. Frahm, C. Brander, A. Sette, HLA class I supertypes: A revised and updated classification. *BMC Immunol.* **9**, 1 (2008). [doi:10.1186/1471-2172-9-1](https://doi.org/10.1186/1471-2172-9-1) [Medline](#)
52. W. McLaren, L. Gil, S. E. Hunt, H. S. Riat, G. R. S. Ritchie, A. Thormann, P. Flicek, F. Cunningham, The Ensembl Variant Effect Predictor. *Genome Biol.* **17**, 122 (2016). [doi:10.1186/s13059-016-0974-4](https://doi.org/10.1186/s13059-016-0974-4) [Medline](#)
53. R. Rosenthal, N. McGranahan, J. Herrero, B. S. Taylor, C. Swanton, DeconstructSigs: Delineating mutational processes in single tumors distinguishes DNA repair deficiencies and patterns of carcinoma evolution. *Genome Biol.* **17**, 31 (2016). [doi:10.1186/s13059-016-0893-4](https://doi.org/10.1186/s13059-016-0893-4) [Medline](#)
54. L. B. Alexandrov, S. Nik-Zainal, D. C. Wedge, S. A. J. R. Aparicio, S. Behjati, A. V. Biankin, G. R. Bignell, N. Bolli, A. Borg, A.-L. Børresen-Dale, S. Boyault, B. Burkhardt, A. P. Butler, C. Caldas, H. R. Davies, C. Desmedt, R. Eils, J. E. Eyfjörd, J. A. Foekens, M. Greaves, F. Hosoda, B. Hutter, T. Ilcic, S. Imbeaud, M. Imielinski, N. Jäger, D. T. W. Jones, D. Jones, S. Knappskog, M. Kool, S. R. Lakhani, C. López-Otín, S. Martin, N. C. Munshi, H. Nakamura, P. A. Northcott, M. Pajic, E. Papaemmanuil, A. Paradiso, J. V.

- Pearson, X. S. Puente, K. Raine, M. Ramakrishna, A. L. Richardson, J. Richter, P. Rosenstiel, M. Schlesner, T. N. Schumacher, P. N. Span, J. W. Teague, Y. Totoki, A. N. J. Tutt, R. Valdés-Mas, M. M. van Buuren, L. van 't Veer, A. Vincent-Salomon, N. Waddell, L. R. Yates, J. Zucman-Rossi, P. A. Futreal, U. McDermott, P. Lichter, M. Meyerson, S. M. Grimmond, R. Siebert, E. Campo, T. Shibata, S. M. Pfister, P. J. Campbell, M. R. Stratton, Australian Pancreatic Cancer Genome Initiative, ICGC Breast Cancer Consortium, ICGC MMML-Seq Consortium, ICGC PedBrain, Signatures of mutational processes in human cancer. *Nature* **500**, 415–421 (2013). [doi:10.1038/nature12477](https://doi.org/10.1038/nature12477) [Medline](#)
55. D. C. Koboldt, Q. Zhang, D. E. Larson, D. Shen, M. D. McLellan, L. Lin, C. A. Miller, E. R. Mardis, L. Ding, R. K. Wilson, VarScan 2: Somatic mutation and copy number alteration discovery in cancer by exome sequencing. *Genome Res.* **22**, 568–576 (2012). [doi:10.1101/gr.129684.111](https://doi.org/10.1101/gr.129684.111) [Medline](#)
56. F. Favero, T. Joshi, A. M. Marquard, N. J. Birkbak, M. Krzystanek, Q. Li, Z. Szallasi, A. C. Eklund, Sequenza: Allele-specific copy number and mutation profiles from tumor sequencing data. *Ann. Oncol.* **26**, 64–70 (2015). [doi:10.1093/annonc/mdu479](https://doi.org/10.1093/annonc/mdu479) [Medline](#)
57. A. Roth, J. Khattra, D. Yap, A. Wan, E. Laks, J. Biele, G. Ha, S. Aparicio, A. Bouchard-Côté, S. P. Shah, PyClone: Statistical inference of clonal population structure in cancer. *Nat. Methods* **11**, 396–398 (2014). [doi:10.1038/nmeth.2883](https://doi.org/10.1038/nmeth.2883) [Medline](#)
58. M. Dolled-Filhart, D. Locke, T. Murphy, F. Lynch, J. H. Yearley, D. Frisman, R. Pierce, R. Weiner, D. Wu, K. Emancipator, Development of a prototype immunohistochemistry assay to measure programmed death ligand-1 expression in tumor tissue. *Arch. Pathol. Lab. Med.* **140**, 1259–1266 (2016). [doi:10.5858/arpa.2015-0544-OA](https://doi.org/10.5858/arpa.2015-0544-OA) [Medline](#)
59. A. I. Daud, J. D. Wolchok, C. Robert, W.-J. Hwu, J. S. Weber, A. Ribas, F. S. Hodi, A. M. Joshua, R. Kefford, P. Hersey, R. Joseph, T. C. Gangadhar, R. Dronca, A. Patnaik, H. Zarour, C. Roach, G. Toland, J. K. Lunceford, X. N. Li, K. Emancipator, M. Dolled-Filhart, S. P. Kang, S. Ebbinghaus, O. Hamid, Programmed death-ligand 1 expression and response to the anti-programmed death 1 antibody pembrolizumab in melanoma. *J. Clin. Oncol.* **34**, 4102–4109 (2016). [doi:10.1200/JCO.2016.67.2477](https://doi.org/10.1200/JCO.2016.67.2477) [Medline](#)
